# Supplementary material
Source: PubMed Central journal article supplement (PMC3119855)
Supplement: NIHMS293380-supplement-03.pdf [file NIHMS293380-supplement-03.pdf]

SRF File: C:\Xcalibur\data\100730RS\100730RS-P04.srf

Database... 100211 uniprot\_sprot\_human.fasta

Filter(s)... peptide probability&lt;=5e-003 ; # distinct peptides&gt;=2 ; protein probability&lt;=1e-003

Mods: (M\* +15.99492) C=160.03064

| Reference  | Sequence                                           | MH+       | z | P      | Sf   | Score | Coverage | Accession      |
|------------|----------------------------------------------------|-----------|---|--------|------|-------|----------|----------------|
| Time(s)    |                                                    |           |   | P      | Sf   | XC    | DeltaCn  | Sp RSp Ions    |
| KCRB_HUMAN | Creatine kinase B-type OS=Homo sapiens GN=CKB PE=1 |           |   | 4e-011 | 2.9  | 30.2  | 0.0      | 0              |
| 19.96      | R.LEQGQAIDDLM*PAQK.-                               | 1672.8211 | 2 | 7e-008 | 0.94 | 2.582 | 0.834    | 941.8 1 17/28  |
| 24.72      | K.LAVEALSSLDGDLAGR.Y                               | 1586.8384 | 2 | 9e-011 | 0.94 | 2.501 | 0.815    | 1113.6 1 17/30 |
| 27.79      | R.LGFSEVELVQM*VVDGVK.L                             | 1864.9725 | 2 | 8e-011 | 0.98 | 4.416 | 0.862    | 2140.0 1 22/32 |
| 27.87      | R.LGFSEVELVQM*VVDGVK.L                             | 1864.9725 | 2 | 4e-011 | 0.98 | 3.991 | 0.845    | 1830.8 1 21/32 |

4 of 7 peptide matches reported, 3 removed due to filtering

|             |                                                    |           |   |        |      |       |       |                |
|-------------|----------------------------------------------------|-----------|---|--------|------|-------|-------|----------------|
| SIRT2_HUMAN | NAD-dependent deacetylase sirtuin-2 OS=Homo sapien |           |   | 6e-007 | 2.9  | 30.2  | 0.0   | 0              |
| 20.17       | R.SPSTGLYDNLEK.Y                                   | 1323.6427 | 2 | 6e-007 | 0.93 | 2.317 | 0.776 | 869.9 1 15/22  |
| 20.27       | R.SPSTGLYDNLEK.Y                                   | 1323.6427 | 2 | 1e-006 | 0.65 | 1.509 | 0.861 | 318.5 1 9/22   |
| 24.25       | R.LLDELTLLEGVAR.Y                                  | 1328.7420 | 2 | 7e-004 | 0.98 | 3.631 | 0.836 | 1910.4 1 18/22 |
| 24.55       | R.NLFSQTLSLGSQK.E                                  | 1422.7587 | 2 | 7e-005 | 0.97 | 2.903 | 0.860 | 1593.6 1 17/24 |

4 of 7 peptide matches reported, 3 removed due to filtering

|            |                                                     |           |   |        |      |       |       |                |
|------------|-----------------------------------------------------|-----------|---|--------|------|-------|-------|----------------|
| SNAG_HUMAN | Gamma-soluble NSF attachment protein OS=Homo sapien |           |   | 4e-005 | 1.8  | 20.1  | 0.0   | 0              |
| 18.79      | K.LIENVDPK.A                                        | 1056.5572 | 2 | 0.0001 | 0.88 | 2.059 | 0.632 | 541.6 1 12/16  |
| 20.70      | R.FDEAALSIQK.E                                      | 1121.5837 | 2 | 4e-005 | 0.96 | 2.648 | 0.682 | 1431.9 1 16/18 |

2 of 3 peptide matches reported, 1 removed due to filtering
