# Supplementary material
Source: PubMed Central journal article supplement (PMC3119855)
Supplement: NIHMS293380-supplement-04.pdf [file NIHMS293380-supplement-04.pdf]

SRF File: C:\Xcalibur\data\100730RS\100730RS-P21.srf

Database... 100211 uniprot\_sprot\_human.fasta

Filter(s)... peptide probability&lt;=5e-003 ; # distinct peptides&gt;=2 ; protein probability&lt;=1e-003

Mods: (M\* +15.99492) C=160.03064

| Reference    | Sequence                                           | MH+       | z | P      | Sf   | Score | Coverage | Accession      |
|--------------|----------------------------------------------------|-----------|---|--------|------|-------|----------|----------------|
| Time (s)     |                                                    |           |   | P      | Sf   | XC    | DeltaCn  | Sp RSp Ions    |
| DPYL2_HUMAN  | Dihydropyrimidinase-related protein 2 OS=Homo sapi |           |   | 8e-015 | 16.5 | 190.3 | 0.0      | 0              |
| 17.78        | R.PEEVEAEAVNR.A                                    | 1242.5961 | 2 | 4e-007 | 0.88 | 2.166 | 0.841    | 594.0 1 11/20  |
| 17.83        | K.SSAEVIAQAR.K                                     | 1031.5480 | 2 | 2e-005 | 0.92 | 2.622 | 0.435    | 1181.1 1 14/18 |
| 17.92        | K.SSAEVIAQAR.K                                     | 1031.5480 | 2 | 4e-006 | 0.94 | 2.795 | 0.432    | 1334.4 1 15/18 |
| 19.92        | K.GIQEEM*EALVK.D                                   | 1262.6297 | 2 | 7e-007 | 0.95 | 2.892 | 0.668    | 1014.7 1 16/20 |
| 19.93        | K.M*DENQFVAVTSTNAAK.I                              | 1741.8061 | 2 | 1e-011 | 0.98 | 5.770 | 0.774    | 997.9 1 19/30  |
| 20.02        | K.M*DENQFVAVTSTNAAK.I                              | 1741.8061 | 3 | 0.0002 | 0.81 | 2.441 | 0.803    | 561.1 1 17/60  |
| 20.07        | K.GIQEEM*EALVK.D                                   | 1262.6297 | 2 | 4e-007 | 0.95 | 2.838 | 0.672    | 983.2 1 16/20  |
| 20.11        | K.M*DENQFVAVTSTNAAK.I                              | 1741.8061 | 3 | 4e-006 | 0.89 | 3.200 | 0.900    | 467.7 1 17/60  |
| 20.18        | R.M*VIPGGIDVHTR.F                                  | 1310.6885 | 2 | 0.0007 | 0.51 | 1.368 | 0.808    | 149.9 1 9/22   |
| 20.85        | K.IVLEDGTLHVTEGSGR.Y                               | 1682.8708 | 3 | 4e-008 | 0.72 | 1.834 | 0.858    | 257.3 1 20/60  |
| 20.97        | K.IVLEDGTLHVTEGSGR.Y                               | 1682.8708 | 2 | 0.0002 | 0.61 | 1.899 | 0.842    | 229.7 1 9/30   |
| 21.01        | K.IVLEDGTLHVTEGSGR.Y                               | 1682.8708 | 3 | 2e-006 | 0.73 | 1.851 | 0.928    | 204.8 1 19/60  |
| 21.07        | R.GSPLVVISQGK.I                                    | 1084.6361 | 2 | 1e-006 | 0.96 | 3.761 | 0.763    | 859.8 1 15/20  |
| 21.17        | R.GSPLVVISQGK.I                                    | 1084.6361 | 2 | 3e-007 | 0.96 | 3.606 | 0.745    | 849.4 1 15/20  |
| 21.48        | R.GLYDGPVCEVSVTPK.T                                | 1620.7938 | 2 | 3e-009 | 0.96 | 2.517 | 0.795    | 1605.7 1 20/28 |
| 21.66        | R.GLYDGPVCEVSVTPK.T                                | 1620.7938 | 2 | 6e-010 | 0.97 | 2.042 | 0.851    | 1846.2 1 21/28 |
| 21.71        | R.DIGAIAQVHAENGDI IAEQQQR.I                        | 2377.1742 | 3 | 9e-011 | 0.84 | 3.144 | 0.796    | 335.8 1 18/84  |
| 21.80        | R.FQM*PDQGM*TSADDFQGTK.A                           | 2182.9056 | 2 | 6e-013 | 0.94 | 4.989 | -        | 1241.2 1 22/36 |
| 21.83        | R.FQM*PDQGM*TSADDFQGTK.A                           | 2182.9056 | 3 | 6e-010 | 0.98 | 6.027 | 0.917    | 879.6 1 26/72  |
| 21.96        | R.FQM*PDQGM*TSADDFQGTK.A                           | 2182.9056 | 2 | 6e-014 | 0.94 | 4.545 | -        | 1405.6 1 23/36 |
| 21.97        | K.VFNLYPR.K                                        | 908.4989  | 2 | 4e-005 | 0.94 | 2.440 | 0.700    | 726.3 1 11/12  |
| 21.99        | R.AITIANQTNCPLYITK.V                               | 1820.9575 | 2 | 2e-012 | 0.98 | 4.445 | 0.862    | 1614.9 1 19/30 |
| 22.00        | R.FQM*PDQGM*TSADDFQGTK.A                           | 2182.9056 | 3 | 2e-009 | 0.97 | 4.844 | 0.924    | 1058.8 1 27/72 |
| 22.04        | R.KPFPDFVYK.R                                      | 1140.6088 | 2 | 4e-006 | 0.94 | 2.603 | 0.684    | 871.8 1 13/16  |
| 22.11        | K.VFNLYPR.K                                        | 908.4989  | 2 | 3e-005 | 0.91 | 2.190 | 0.673    | 604.2 1 10/12  |
| 22.13        | K.QIGENLIVPGGVK.T                                  | 1323.7631 | 2 | 3e-006 | 0.85 | 2.525 | 0.802    | 352.7 1 12/24  |
| 22.14        | R.AITIANQTNCPLYITK.V                               | 1820.9575 | 2 | 3e-013 | 0.96 | 3.227 | 0.820    | 1374.7 1 18/30 |
| 22.18        | R.KPFPDFVYK.R                                      | 1140.6088 | 2 | 8e-006 | 0.94 | 2.553 | 0.625    | 932.0 1 13/16  |
| 22.27        | K.QIGENLIVPGGVK.T                                  | 1323.7631 | 2 | 3e-005 | 0.86 | 2.415 | 0.797    | 381.0 1 13/24  |
| 22.32        | R.NLHQSGFSLSGAQIDDNIPR.R                           | 2169.0683 | 3 | 9e-005 | 0.84 | 3.077 | 0.672    | 385.3 1 23/76  |
| 22.76        | K.DNFTLIEGTEER.M                                   | 1792.8348 | 2 | 3e-006 | 0.61 | 1.468 | 0.779    | 231.1 1 12/30  |
| 25.24 - 25.2 | H.IVNDDQSFYADIYM*EDGLIK.Q                          | 2365.0904 | 2 | 1e-012 | 0.98 | 4.913 | 0.932    | 1246.6 1 20/38 |
| 25.44        | R.IAVGSDADLVIWDPDSVK.T                             | 1899.9698 | 2 | 8e-015 | 0.96 | 3.328 | 0.831    | 1112.6 1 20/34 |
| 25.63        | R.IAVGSDADLVIWDPDSVK.T                             | 1899.9698 | 2 | 6e-006 | 0.90 | 2.724 | 0.862    | 611.9 1 15/34  |
| 28.57 - 28.6 | R.FQLTDCQIYEVLSVIR.D                               | 1984.0208 | 3 | 2e-005 | 0.80 | 2.168 | 0.804    | 517.9 1 18/60  |

35 of 41 peptide matches reported, 6 removed due to filtering

|              |                                                    |           |   |        |      |       |       |                |
|--------------|----------------------------------------------------|-----------|---|--------|------|-------|-------|----------------|
| DPYL3_HUMAN  | Dihydropyrimidinase-related protein 3 OS=Homo sapi |           |   | 1e-012 | 2.0  | 20.3  | 0.0   | 0              |
| 19.93        | K.M*DENQFVAVTSTNAAK.I                              | 1741.8061 | 2 | 1e-011 | 0.98 | 5.770 | 0.774 | 997.9 1 19/30  |
| 20.02        | K.M*DENQFVAVTSTNAAK.I                              | 1741.8061 | 3 | 0.0002 | 0.81 | 2.441 | 0.803 | 561.1 1 17/60  |
| 20.11        | K.M*DENQFVAVTSTNAAK.I                              | 1741.8061 | 3 | 4e-006 | 0.89 | 3.200 | 0.900 | 467.7 1 17/60  |
| 25.24 - 25.2 | H.IVNDDQSFYADIYM*EDGLIK.Q                          | 2365.0904 | 2 | 1e-012 | 0.98 | 4.913 | 0.932 | 1246.6 1 20/38 |

4 of 8 peptide matches reported, 4 removed due to filtering

|             |                                                    |           |   |        |      |       |       |               |
|-------------|----------------------------------------------------|-----------|---|--------|------|-------|-------|---------------|
| DPYL1_HUMAN | Dihydropyrimidinase-related protein 1 OS=Homo sapi |           |   | 1e-011 | 1.8  | 20.3  | 0.0   | 0             |
| 19.93       | K.M*DENQFVAVTSTNAAK.I                              | 1741.8061 | 2 | 1e-011 | 0.98 | 5.770 | 0.774 | 997.9 1 19/30 |
| 20.02       | K.M*DENQFVAVTSTNAAK.I                              | 1741.8061 | 3 | 0.0002 | 0.81 | 2.441 | 0.803 | 561.1 1 17/60 |
| 20.11       | K.M*DENQFVAVTSTNAAK.I                              | 1741.8061 | 3 | 4e-006 | 0.89 | 3.200 | 0.900 | 467.7 1 17/60 |
| 22.13       | K.QIGENLIVPGGVK.T                                  | 1323.7631 | 2 | 3e-006 | 0.85 | 2.525 | 0.802 | 352.7 1 12/24 |
| 22.27       | K.QIGENLIVPGGVK.T                                  | 1323.7631 | 2 | 3e-005 | 0.86 | 2.415 | 0.797 | 381.0 1 13/24 |

5 of 6 peptide matches reported, 1 removed due to filtering
