# Supplementary material
Source: PubMed Central journal article supplement (PMC3119855)
Supplement: NIHMS293380-supplement-05.pdf [file NIHMS293380-supplement-05.pdf]

SRF File: C:\Xcalibur\data\100730RS\100730RS-P09.srf

Database... 100211 uniprot\_sprot\_human.fasta

Filter(s)... peptide probability&lt;=5e-003 ; # distinct peptides&gt;=2 ; protein probability&lt;=1e-003

Mods: (M\* +15.99492) C=160.03064

| Reference   | Sequence                                           | MH+       | z | P      | Sf   | Score | Coverage | Accession      |
|-------------|----------------------------------------------------|-----------|---|--------|------|-------|----------|----------------|
| Time (s)    |                                                    |           |   | P      | Sf   | XC    | DeltaCn  | Sp RSp Ions    |
| DPYL2_HUMAN | Dihydropyrimidinase-related protein 2 OS=Homo sapi |           |   | 1e-012 | 8.5  | 100.2 | 0.0      | 0              |
| 19.93       | K.M*DENQFVAVTSTNAAK.I                              | 1741.8061 | 2 | 6e-012 | 0.97 | 4.068 | 0.777    | 1246.7 1 21/30 |
| 20.04       | K.M*DENQFVAVTSTNAAK.I                              | 1741.8061 | 2 | 1e-006 | 0.90 | 2.264 | 0.893    | 613.9 1 15/30  |
| 20.68       | K.IVLEDGTLHVTEGSGR.Y                               | 1682.8708 | 3 | 3e-005 | 0.68 | 1.827 | -        | 127.2 1 15/60  |
| 21.15       | R.GSPLVVISQGK.I                                    | 1084.6361 | 2 | 7e-011 | 0.94 | 2.837 | 0.762    | 770.8 1 15/20  |
| 21.38       | R.GSPLVVISQGK.I                                    | 1084.6361 | 2 | 3e-006 | 0.84 | 2.024 | 0.706    | 542.4 1 12/20  |
| 21.47       | R.GLYDGPVCEVSVTPK.T                                | 1620.7938 | 2 | 2e-009 | 0.94 | 2.242 | 0.918    | 1069.1 1 17/28 |
| 21.79       | R.FQM*PDQGM*TSADDFQGTK.A                           | 2182.9056 | 2 | 2e-012 | 0.90 | 4.043 | -        | 1191.6 1 22/36 |
| 21.86       | R.FQM*PDQGM*TSADDFQGTK.A                           | 2182.9056 | 3 | 0.0002 | 0.64 | 2.297 | 0.864    | 123.0 1 11/72  |
| 21.90       | R.KPFPDFVYK.R                                      | 1140.6088 | 2 | 0.001  | 0.55 | 1.583 | 0.587    | 305.8 1 8/16   |
| 21.96       | K.VFNLYPR.K                                        | 908.4989  | 2 | 8e-005 | 0.94 | 2.339 | 0.738    | 684.0 1 11/12  |
| 22.02       | R.AITIANQTNCPLYITK.V                               | 1820.9575 | 2 | 1e-012 | 0.95 | 3.134 | 0.805    | 1202.0 1 17/30 |
| 22.06       | R.FQM*PDQGM*TSADDFQGTK.A                           | 2182.9056 | 2 | 0.0004 | 0.45 | 1.662 | 0.863    | 107.0 1 7/36   |
| 22.13       | K.QIGENLIVPGGVK.T                                  | 1323.7631 | 2 | 0.0004 | 0.87 | 2.164 | 0.766    | 397.2 1 15/24  |
| 22.19       | K.VFNLYPR.K                                        | 908.4989  | 2 | 4e-005 | 0.89 | 1.892 | 0.813    | 455.9 1 9/12   |
| 22.28       | K.QIGENLIVPGGVK.T                                  | 1323.7631 | 2 | 0.0007 | 0.46 | 1.495 | 0.754    | 151.0 1 9/24   |
| 25.31       | K.IVNDDQSFYADIYM*EDGLIK.Q                          | 2365.0904 | 2 | 3e-005 | 0.83 | 2.303 | 0.897    | 422.2 1 12/38  |

16 of 18 peptide matches reported, 2 removed due to filtering

|             |                                                    |           |   |        |      |       |       |                |
|-------------|----------------------------------------------------|-----------|---|--------|------|-------|-------|----------------|
| DPYL1_HUMAN | Dihydropyrimidinase-related protein 1 OS=Homo sapi |           |   | 6e-012 | 7.9  | 90.2  | 0.0   | 0              |
| 19.93       | K.M*DENQFVAVTSTNAAK.I                              | 1741.8061 | 2 | 6e-012 | 0.97 | 4.068 | 0.777 | 1246.7 1 21/30 |
| 20.04       | K.M*DENQFVAVTSTNAAK.I                              | 1741.8061 | 2 | 1e-006 | 0.90 | 2.264 | 0.893 | 613.9 1 15/30  |
| 20.61       | R.GM*YDGPVYEVPAATPK.Y                              | 1639.7672 | 2 | 2e-009 | 0.96 | 3.489 | 0.888 | 828.1 1 17/28  |
| 20.72       | R.GM*YDGPVYEVPAATPK.Y                              | 1639.7672 | 2 | 2e-008 | 0.88 | 2.501 | 0.924 | 464.2 1 12/28  |
| 21.33       | K.IVFEDGNINVNK.G                                   | 1361.7060 | 2 | 2e-007 | 0.96 | 2.457 | 0.804 | 1430.7 1 18/22 |
| 21.56       | K.IVFEDGNINVNK.G                                   | 1361.7060 | 2 | 0.0001 | 0.20 | 0.604 | 0.545 | 319.6 1 9/22   |
| 21.69       | R.EELEVLVQDK.G                                     | 1201.6311 | 2 | 0.001  | 0.67 | 1.507 | 0.680 | 282.1 1 10/18  |
| 21.70       | K.VFGLQVSR.G                                       | 962.5418  | 2 | 0.0009 | 0.90 | 2.301 | 0.792 | 493.0 1 11/16  |
| 22.13       | K.QIGENLIVPGGVK.T                                  | 1323.7631 | 2 | 0.0004 | 0.87 | 2.164 | 0.766 | 397.2 1 15/24  |
| 22.28       | K.QIGENLIVPGGVK.T                                  | 1323.7631 | 2 | 0.0007 | 0.46 | 1.495 | 0.754 | 151.0 1 9/24   |
| 22.76       | K.SAADIIALAR.K                                     | 1000.5786 | 2 | 2e-006 | 0.97 | 3.474 | 0.656 | 1477.2 1 16/18 |
| 22.82       | K.IFNLYPR.K                                        | 922.5145  | 2 | 0.0005 | 0.79 | 1.771 | 0.476 | 480.1 1 9/12   |
| 22.92       | K.SAADIIALAR.K                                     | 1000.5786 | 2 | 4e-006 | 0.96 | 3.155 | 0.631 | 1274.9 1 15/18 |
| 27.66       | - 27.7K.DVYQM*SDSOLYEAFITFLK.G                     | 2201.0107 | 2 | 2e-010 | 0.82 | 1.881 | 0.872 | 524.0 1 13/34  |

14 of 15 peptide matches reported, 1 removed due to filtering

|             |                                                    |           |   |        |      |       |       |                |
|-------------|----------------------------------------------------|-----------|---|--------|------|-------|-------|----------------|
| DPYL3_HUMAN | Dihydropyrimidinase-related protein 3 OS=Homo sapi |           |   | 6e-012 | 2.6  | 30.2  | 0.0   | 0              |
| 19.93       | K.M*DENQFVAVTSTNAAK.I                              | 1741.8061 | 2 | 6e-012 | 0.97 | 4.068 | 0.777 | 1246.7 1 21/30 |
| 20.04       | K.M*DENQFVAVTSTNAAK.I                              | 1741.8061 | 2 | 1e-006 | 0.90 | 2.264 | 0.893 | 613.9 1 15/30  |
| 22.82       | K.IFNLYPR.K                                        | 922.5145  | 2 | 0.0005 | 0.79 | 1.771 | 0.476 | 480.1 1 9/12   |
| 25.31       | K.IVNDDQSFYADIYM*EDGLIK.Q                          | 2365.0904 | 2 | 3e-005 | 0.83 | 2.303 | 0.897 | 422.2 1 12/38  |

4 of 5 peptide matches reported, 1 removed due to filtering

2553.3770 3 1e-009 0.73 2.545 0.574 499.2 1 21/96
