# Supplementary material
Source: PubMed Central journal article supplement (PMC3119855)
Supplement: NIHMS293380-supplement-06.pdf [file NIHMS293380-supplement-06.pdf]

SRF File: C:\Xcalibur\data\100730RS\100730RS-P22.srf

Database... 100211 uniprot\_sprot\_human.fasta

Filter(s)... peptide probability&lt;=5e-003 ; # distinct peptides&gt;=2 ; protein probability&lt;=1e-003

Mods: (M\* +15.99492) C=160.03064

| Reference   | Sequence                                           | MH+       | z | P      | Sf   | Score | Coverage | Accession      |
|-------------|----------------------------------------------------|-----------|---|--------|------|-------|----------|----------------|
| Time (s)    |                                                    |           |   | P      | Sf   | XC    | DeltaCn  | Sp RSp Ions    |
| DPYL2_HUMAN | Dihydropyrimidinase-related protein 2 OS=Homo sapi |           |   | 1e-030 | 15.0 | 170.3 | 0.0      | 0              |
| 17.82       | K.SSAEVIQAAR.K                                     | 1031.5480 | 2 | 2e-005 | 0.93 | 2.667 | 0.438    | 1274.3 1 14/18 |
| 17.91       | K.SSAEVIQAAR.K                                     | 1031.5480 | 2 | 8e-006 | 0.94 | 2.968 | 0.446    | 1250.6 1 14/18 |
| 19.86       | K.GIQEEM*EALVK.D                                   | 1262.6297 | 2 | 7e-007 | 0.95 | 2.820 | 0.721    | 1007.0 1 16/20 |
| 20.01       | K.M*DENQFVAVTSTNAAK.I                              | 1741.8061 | 2 | 9e-015 | 0.98 | 4.664 | 0.751    | 1429.3 1 22/30 |
| 20.03       | K.GIQEEM*EALVK.D                                   | 1262.6297 | 2 | 1e-006 | 0.95 | 2.641 | 0.698    | 979.3 1 16/20  |
| 20.78       | K.IVLEDGTLHVTGSGR.Y                                | 1682.8708 | 3 | 5e-005 | 0.77 | 2.484 | 0.769    | 248.5 1 20/60  |
| 20.96       | K.IVLEDGTLHVTGSGR.Y                                | 1682.8708 | 3 | 7e-005 | 0.67 | 2.374 | 0.760    | 147.6 1 16/60  |
| 21.11       | R.GSPLVVISQGK.I                                    | 1084.6361 | 2 | 6e-007 | 0.96 | 3.461 | 0.774    | 860.1 1 15/20  |
| 21.27       | R.GSPLVVISQGK.I                                    | 1084.6361 | 2 | 8e-008 | 0.95 | 3.067 | 0.751    | 785.1 1 15/20  |
| 21.60       | R.GLYDGPVCEVSVTPK.T                                | 1620.7938 | 2 | 3e-010 | 0.98 | 3.464 | 0.907    | 2028.2 1 22/28 |
| 21.71       | R.DIGAIAQVHAENGDI IAEQQR.I                         | 2377.1742 | 3 | 4e-010 | 0.91 | 3.360 | 0.830    | 672.8 1 24/84  |
| 21.91       | R.FQM*PDQGM*TSADDFQGTK.A                           | 2182.9056 | 2 | 5e-017 | 0.94 | 4.821 | -        | 1330.5 1 23/36 |
| 21.92       | R.FQM*PDQGM*TSADDFQGTK.A                           | 2182.9056 | 3 | 1e-008 | 0.98 | 5.111 | 0.933    | 1444.7 1 30/72 |
| 22.01       | R.KPFPDFVYK.R                                      | 1140.6088 | 2 | 5e-006 | 0.92 | 2.520 | 0.675    | 728.0 1 12/16  |
| 22.07       | K.VFNLYPR.K                                        | 908.4989  | 2 | 1e-005 | 0.94 | 2.492 | 0.726    | 718.1 1 11/12  |
| 22.08       | R.AITIANQTNCLPLYITK.V                              | 1820.9575 | 2 | 1e-013 | 0.97 | 3.835 | 0.839    | 1670.1 1 19/30 |
| 22.10       | R.KPFPDFVYK.R                                      | 1140.6088 | 2 | 2e-006 | 0.91 | 2.359 | 0.645    | 725.3 1 12/16  |
| 22.12       | R.FQM*PDQGM*TSADDFQGTK.A                           | 2182.9056 | 2 | 2e-009 | 0.75 | 3.282 | -        | 835.1 1 18/36  |
| 22.23       | K.QIGENLIVPGGVK.T                                  | 1323.7631 | 2 | 4e-006 | 0.91 | 2.769 | 0.866    | 437.6 1 14/24  |
| 22.24       | K.VFNLYPR.K                                        | 908.4989  | 2 | 9e-005 | 0.92 | 2.135 | 0.773    | 567.5 1 10/12  |
| 22.29       | R.NLHQSGFSLSGAQIDDNIPR.R                           | 2169.0683 | 3 | 0.0004 | 0.72 | 2.465 | 0.765    | 200.5 1 18/76  |
| 22.32       | R.AITIANQTNCLPLYITK.V                              | 1820.9575 | 2 | 2e-011 | 0.92 | 2.382 | 0.900    | 881.4 1 15/30  |
| 22.38       | K.QIGENLIVPGGVK.T                                  | 1323.7631 | 2 | 0.0002 | 0.82 | 2.170 | 0.776    | 298.4 1 13/24  |
| 22.79       | K.DNFTLIPGTTNGTEER.M                               | 1792.8348 | 2 | 0.0001 | 0.24 | 1.326 | 0.670    | 95.9 1 8/30    |
| 25.29       | K.IVNDDQSFYADIYM*EDGLIK.Q                          | 2365.0904 | 2 | 1e-013 | 0.98 | 4.615 | 0.929    | 1280.6 1 21/38 |
| 25.38       | K.IVNDDQSFYADIYM*EDGLIK.Q                          | 2365.0904 | 2 | 5e-012 | 0.97 | 3.956 | 0.907    | 1041.5 1 19/38 |
| 25.55       | R.IAVGSDADLVIWDPDSVK.T                             | 1899.9698 | 2 | 3e-010 | 0.95 | 3.366 | 0.893    | 810.7 1 18/34  |
| 28.57       | R.FQLTDCQIYEVLVSVIR.D                              | 1984.0208 | 2 | 2e-012 | 0.95 | 3.266 | 0.896    | 955.2 1 16/30  |
| 28.59       | R.FQLTDCQIYEVLVSVIR.D                              | 1984.0208 | 3 | 2e-005 | 0.67 | 2.016 | 0.803    | 313.4 1 14/60  |
| 28.66       | R.FQLTDCQIYEVLVSVIR.D                              | 1984.0208 | 2 | 4e-007 | 0.65 | 1.758 | 0.860    | 268.6 1 9/30   |

30 of 33 peptide matches reported, 3 removed due to filtering

|             |                                                    |           |   |        |      |       |       |                |
|-------------|----------------------------------------------------|-----------|---|--------|------|-------|-------|----------------|
| DPYL1_HUMAN | Dihydropyrimidinase-related protein 1 OS=Homo sapi |           |   | 9e-015 | 4.1  | 50.2  | 0.0   | 0              |
| 20.01       | K.M*DENQFVAVTSTNAAK.I                              | 1741.8061 | 2 | 9e-015 | 0.98 | 4.664 | 0.751 | 1429.3 1 22/30 |
| 20.69       | R.GM*YDGPVYEVDPATPK.Y                              | 1639.7672 | 2 | 3e-006 | 0.89 | 2.613 | 0.906 | 456.4 1 13/28  |
| 21.53       | K.IVFEDGNINVNK.G                                   | 1361.7060 | 2 | 1e-006 | 0.43 | 0.774 | 0.844 | 230.3 1 9/22   |
| 22.23       | K.QIGENLIVPGGVK.T                                  | 1323.7631 | 2 | 4e-006 | 0.91 | 2.769 | 0.866 | 437.6 1 14/24  |
| 22.38       | K.QIGENLIVPGGVK.T                                  | 1323.7631 | 2 | 0.0002 | 0.82 | 2.170 | 0.776 | 298.4 1 13/24  |
| 22.91       | K.IFNLYPR.K                                        | 922.5145  | 2 | 0.0001 | 0.86 | 2.167 | 0.574 | 470.3 1 9/12   |

6 of 9 peptide matches reported, 3 removed due to filtering

|             |                                                    |           |   |        |      |       |       |                |
|-------------|----------------------------------------------------|-----------|---|--------|------|-------|-------|----------------|
| DPYL3_HUMAN | Dihydropyrimidinase-related protein 3 OS=Homo sapi |           |   | 9e-015 | 2.8  | 30.2  | 0.0   | 0              |
| 20.01       | K.M*DENQFVAVTSTNAAK.I                              | 1741.8061 | 2 | 9e-015 | 0.98 | 4.664 | 0.751 | 1429.3 1 22/30 |
| 22.91       | K.IFNLYPR.K                                        | 922.5145  | 2 | 0.0001 | 0.86 | 2.167 | 0.574 | 470.3 1 9/12   |
| 25.29       | K.IVNDDQSFYADIYM*EDGLIK.Q                          | 2365.0904 | 2 | 1e-013 | 0.98 | 4.615 | 0.929 | 1280.6 1 21/38 |
| 25.38       | K.IVNDDQSFYADIYM*EDGLIK.Q                          | 2365.0904 | 2 | 5e-012 | 0.97 | 3.956 | 0.907 | 1041.5 1 19/38 |

4 of 9 peptide matches reported, 5 removed due to filtering

|            |                                                     |           |   |        |      |       |       |                |
|------------|-----------------------------------------------------|-----------|---|--------|------|-------|-------|----------------|
| PUR9_HUMAN | Bifunctional purine biosynthesis protein PURH OS=Ho |           |   | 4e-012 | 6.5  | 80.2  | 0.0   | 0              |
| 22.26      | K.SLFSNVVTK.N                                       | 994.5568  | 2 | 0.0001 | 0.90 | 2.411 | 0.552 | 540.9 1 13/16  |
| 22.75      | K.EALGIPAAASF.K                                     | 1174.6467 | 2 | 0.0003 | 0.46 | 1.856 | 0.443 | 199.3 1 11/22  |
| 23.86      | R.DVSELTFPEM*LGGR.V                                 | 1623.7683 | 2 | 7e-009 | 0.93 | 2.808 | 0.793 | 623.7 1 17/28  |
| 24.13      | R.LDFNLIR.V                                         | 890.5094  | 2 | 0.002  | 0.75 | 1.825 | 0.234 | 276.8 1 11/12  |
| 24.90      | R.NLTALGLNLVASGGTAK.A                               | 1599.9064 | 2 | 4e-012 | 0.98 | 4.806 | 0.826 | 2104.7 1 23/32 |
| 26.91      | R.EVSDGI IAPGYEEEEALTI LSK.K                        | 2234.1438 | 2 | 6e-011 | 0.90 | 3.118 | 0.915 | 283.4 1 16/40  |
| 27.23      | K.ALFEVPELLTEAEK.K                                  | 1717.8895 | 2 | 8e-012 | 0.95 | 2.948 | 0.780 | 929.2 1 20/28  |
| 27.45      | K.ALFEVPELLTEAEK.K                                  | 1717.8895 | 2 | 0.0002 | 0.58 | 1.799 | 0.729 | 207.7 1 10/28  |
| 29.01      | K.TVASPGVTVEEAVEQIDIGGVTL L R.A                     | 2553.3770 | 3 | 0.0001 | 0.89 | 3.884 | 0.593 | 635.3 1 23/96  |
| 29.09      | K.TVASPGVTVEEAVEQIDIGGVTL L R.A                     | 2553.3770 | 3 | 2e-006 | 0.64 | 2.595 | 0.606 | 256.0 1 16/96  |

10 of 12 peptide matches reported, 2 removed due to filtering
