# Supplementary material
Source: PubMed Central journal article supplement (PMC3119855)
Supplement: NIHMS293380-supplement-07.pdf [file NIHMS293380-supplement-07.pdf]

SRF File: C:\Xcalibur\data\100730RS\100730RS-P11.srf

Database... 100211 uniprot\_sprot\_human.fasta

Filter(s)... peptide probability<=5e-003 ; # distinct peptides>=2 ; protein probability<=1e-003

Mods: (M\* +15.99492) C=160.03064

| Reference    | Sequence                                        | MH+       | z | P      | Sf   | Score | Coverage | Accession     |
|--------------|-------------------------------------------------|-----------|---|--------|------|-------|----------|---------------|
| Time(s)      |                                                 |           |   | P      | Sf   | XC    | DeltaCn  | Sp RSp Ions   |
| ENOA_HUMAN   | Alpha-enolase OS=Homo sapiens GN=ENO1 PE=1 SV=2 |           |   | 5e-010 | 2.6  | 40.1  | 0.0      | 0             |
| 23.26 - 23.3 | R.GNPTVEVDLFTSK.G                               | 1406.7162 | 2 | 6e-008 | 0.29 | 2.266 | 0.240    | 178.1 1 10/24 |
| 23.66 - 23.7 | K.FTASAGIQVVGDDLTVTNPK.R                        | 2033.0550 | 2 | 5e-007 | 0.73 | 2.149 | 0.843    | 244.7 1 12/38 |
| 24.59 - 24.6 | K.VVIGM*DVAASEFFR.S                             | 1556.7777 | 2 | 3e-009 | 0.91 | 2.390 | 0.885    | 659.6 1 14/26 |
| 24.80 - 24.8 | R.AAVPSGASTGIYEALRL.D                           | 1804.9440 | 2 | 5e-010 | 0.71 | 1.701 | 0.808    | 178.3 1 15/34 |

4 of 4 peptide matches reported, 0 removed due to filtering

|              |                                                 |           |   |        |      |       |       |               |
|--------------|-------------------------------------------------|-----------|---|--------|------|-------|-------|---------------|
| ENOG_HUMAN   | Gamma-enolase OS=Homo sapiens GN=ENO2 PE=1 SV=3 |           |   | 5e-010 | 0.7  | 18.1  | 0.0   | 0             |
| 23.26 - 23.3 | R.GNPTVEVDLYTAK.G                               | 1406.7162 | 2 | 4e-005 | 0.03 | 1.721 | 0.903 | 104.1 2 8/24  |
| 24.80 - 24.8 | R.AAVPSGASTGIYEALRL.D                           | 1804.9440 | 2 | 5e-010 | 0.71 | 1.701 | 0.808 | 178.3 1 15/34 |

2 of 2 peptide matches reported, 0 removed due to filtering
