# Supplementary material
Source: PubMed Central journal article supplement (PMC3119855)
Supplement: NIHMS293380-supplement-08.pdf [file NIHMS293380-supplement-08.pdf]

SRF File: C:\Xcalibur\data\100730RS\100730RS-P02.srf

Database... 100211 uniprot\_sprot\_human.fasta

Filter(s)... peptide probability&lt;=5e-003 ; # distinct peptides&gt;=2 ; protein probability&lt;=1e-003

Mods: (M\* +15.99492) C=160.03064

| Reference  | Sequence                                        | MH+       | z | P      | Sf   | Score | Coverage | Accession      |
|------------|-------------------------------------------------|-----------|---|--------|------|-------|----------|----------------|
| Time (s)   |                                                 |           |   | P      | Sf   | XC    | DeltaCn  | Sp RSp Ions    |
| ENOG_HUMAN | Gamma-enolase OS=Homo sapiens GN=ENO2 PE=1 SV=3 |           |   | 1e-014 | 4.8  | 60.2  | 0.0      | 0              |
| 18.49      | R.IEEELGDEAR.F                                  | 1160.5430 | 2 | 0.001  | 0.16 | 1.259 | 0.277    | 299.7 1 8/18   |
| 21.33      | R.GNPTVEVDLYTAK.G                               | 1406.7162 | 2 | 1e-008 | 0.81 | 3.124 | 0.140    | 515.5 1 17/24  |
| 21.46      | K.VNQIGSVTEAIQACK.L                             | 1617.8265 | 2 | 3e-013 | 0.98 | 4.238 | 0.866    | 1788.5 1 22/28 |
| 22.43      | K.LDNLM*LLEDGTENK.S                             | 1620.7785 | 2 | 3e-011 | 0.97 | 3.369 | 0.799    | 1382.3 1 20/26 |
| 24.84      | R.AAVPSGASTGIYEALRLR.D                          | 1804.9440 | 2 | 1e-014 | 0.92 | 2.538 | 0.691    | 594.2 1 24/34  |
| 27.10      | R.YITGDQLGALYQDFVR.D                            | 1858.9334 | 2 | 6e-012 | 0.97 | 3.463 | 0.912    | 1304.6 1 21/30 |

6 of 7 peptide matches reported, 1 removed due to filtering

|            |                                                 |           |   |        |      |       |       |               |
|------------|-------------------------------------------------|-----------|---|--------|------|-------|-------|---------------|
| ENOA_HUMAN | Alpha-enolase OS=Homo sapiens GN=ENO1 PE=1 SV=2 |           |   | 1e-012 | 1.4  | 18.1  | 0.0   | 0             |
| 21.33      | R.GNPTVEVDLFTSK.G                               | 1406.7162 | 2 | 0.0001 | 0.46 | 2.687 | 0.887 | 301.7 2 14/24 |
| 24.84      | R.AAVPSGASTGIYEALRLR.D                          | 1804.9440 | 2 | 1e-012 | 0.92 | 2.538 | 0.691 | 594.2 1 24/34 |

2 of 2 peptide matches reported, 0 removed due to filtering
