# Supplementary material
Source: PubMed Central journal article supplement (PMC3119855)
Supplement: NIHMS293380-supplement-09.pdf [file NIHMS293380-supplement-09.pdf]

SRF File: C:\Xcalibur\data\100730RS\100730RS-P24.srf

Database... 100211 uniprot\_sprot\_human.fasta

Filter(s)... peptide probability&lt;=5e-003 ; # distinct peptides&gt;=2 ; protein probability&lt;=1e-003

Mods: (M\* +15.99492) C=160.03064

| Reference | Sequence                                 | MH+         | z | P      | Sf   | Score | Coverage | Accession      |
|-----------|------------------------------------------|-------------|---|--------|------|-------|----------|----------------|
| Time (s)  |                                          |             |   | P      | Sf   | XC    | DeltaCn  | Sp RSp Ions    |
| G3P_HUMAN | Glyceraldehyde-3-phosphate dehydrogenase | OS=Homo sap |   | 3e-012 | 5.0  | 70.2  | 0.0      | 0              |
| 18.12     | K.LTGM*AFR.V                             | 811.4131    | 2 | 0.0008 | 0.84 | 1.927 | 0.524    | 362.7 1 10/12  |
| 18.24     | K.LTGM*AFR.V                             | 811.4131    | 2 | 0.0009 | 0.88 | 1.937 | 0.667    | 360.0 1 10/12  |
| 21.64     | R.VIISAPSADAPM*FVM*GVNHEK.Y              | 2245.0992   | 3 | 0.0008 | 0.57 | 2.168 | 0.839    | 65.8 1 11/80   |
| 21.67     | R.GALQNIIPASTGAAK.A                      | 1411.7904   | 2 | 1e-006 | 0.90 | 2.616 | 0.794    | 471.1 1 16/28  |
| 21.78     | R.GALQNIIPASTGAAK.A                      | 1411.7904   | 2 | 6e-006 | 0.90 | 2.957 | 0.795    | 392.9 1 15/28  |
| 21.97     | R.VPTANVSVDLTCR.L                        | 1530.7944   | 2 | 5e-011 | 0.95 | 3.186 | 0.870    | 854.8 1 17/26  |
| 22.10     | R.VPTANVSVDLTCR.L                        | 1530.7944   | 2 | 4e-012 | 0.95 | 2.734 | 0.866    | 928.7 1 18/26  |
| 22.98     | R.GALQNIIPASTGAAK.A                      | 1411.7904   | 2 | 1e-005 | 0.28 | 1.502 | 0.689    | 128.8 1 8/28   |
| 24.43     | K.LISWYDNEFGYSNR.V                       | 1763.8024   | 2 | 3e-012 | 0.98 | 3.588 | 0.890    | 1554.8 1 19/26 |
| 24.56     | K.LISWYDNEFGYSNR.V                       | 1763.8024   | 2 | 1e-010 | 0.97 | 3.188 | 0.870    | 1387.4 1 18/26 |
| 25.75     | K.LVINGNPITIFQER.D                       | 1613.9010   | 2 | 7e-012 | 0.71 | 2.261 | 0.734    | 255.2 1 10/26  |
| 28.38     | K.VDIVAINDPFIDLNYM*VYM*FQYDSTHGK.F       | 3340.5541   | 3 | 4e-005 | 0.04 | 1.385 | -        | 64.3 1 9/108   |

12 of 15 peptide matches reported, 3 removed due to filtering

|            |                     |                                  |   |        |      |       |       |                |
|------------|---------------------|----------------------------------|---|--------|------|-------|-------|----------------|
| ALBU_HUMAN | Serum albumin       | OS=Homo sapiens GN=ALB PE=1 SV=2 |   | 0.0002 | 1.8  | 20.2  | 0.0   | 0              |
| 20.90      | K.YLYEIIAR.R        | 927.4934                         | 2 | 0.0002 | 0.89 | 2.166 | 0.495 | 444.3 1 11/12  |
| 21.01      | K.KVPQVSTPTLVEVSR.N | 1639.9377                        | 3 | 0.0003 | 0.96 | 3.778 | 0.938 | 1030.5 1 26/56 |

2 of 4 peptide matches reported, 2 removed due to filtering
