# Supplementary material
Source: PubMed Central journal article supplement (PMC3119855)
Supplement: NIHMS293380-supplement-10.pdf [file NIHMS293380-supplement-10.pdf]

SRF File: C:\Xcalibur\data\100730RS\100730RS-P08.srf

Database... 100211 uniprot\_sprot\_human.fasta

Filter(s)... peptide probability&lt;=5e-003 ; # distinct peptides&gt;=2 ; protein probability&lt;=1e-003

Mods: (M\* +15.99492) C=160.03064

| Reference                                                      | Sequence                | MH+       | z | P      | Sf   | Score | Coverage | Accession |     |       |
|----------------------------------------------------------------|-------------------------|-----------|---|--------|------|-------|----------|-----------|-----|-------|
| Time (s)                                                       |                         |           |   | P      | Sf   | XC    | DeltaCn  | Sp        | RSp | Ions  |
| GDIB_HUMAN Rab GDP dissociation inhibitor beta OS=Homo sapiens |                         |           |   | 1e-030 | 16.8 | 200.3 | 0.0      | 0         |     |       |
| 18.53                                                          | K.LYSESLAR.Y            | 938.4942  | 2 | 0.0002 | 0.88 | 1.693 | 0.545    | 527.7     | 1   | 13/14 |
| 18.64                                                          | K.LYSESLAR.Y            | 938.4942  | 2 | 0.0001 | 0.90 | 1.819 | 0.597    | 507.3     | 1   | 13/14 |
| 19.41                                                          | R.TFEGIDPK.K            | 906.4567  | 2 | 0.0004 | 0.95 | 2.986 | 0.734    | 735.1     | 1   | 12/14 |
| 19.43                                                          | K.VTEGSEFVYK.G          | 1029.5251 | 2 | 2e-006 | 0.90 | 1.776 | 0.610    | 626.8     | 1   | 14/16 |
| 19.58                                                          | K.VTEGSEFVYK.G          | 1029.5251 | 2 | 4e-006 | 0.58 | 1.453 | 0.485    | 300.5     | 1   | 10/16 |
| 20.10                                                          | K.NTNDANSCQIIPQNQVNR.K  | 2199.0571 | 3 | 9e-005 | 0.37 | 1.894 | 0.565    | 156.9     | 1   | 13/72 |
| 20.18                                                          | K.QLICDPSYVK.D          | 1222.6136 | 2 | 4e-005 | 0.78 | 1.889 | 0.450    | 392.9     | 1   | 13/18 |
| 20.37                                                          | K.QLICDPSYVK.D          | 1222.6136 | 2 | 0.002  | 0.26 | 1.398 | 0.341    | 164.1     | 1   | 9/18  |
| 20.70                                                          | R.M*TGSEPDFEEM*K.R      | 1482.5763 | 2 | 4e-006 | 0.23 | 1.869 | -        | 439.3     | 1   | 11/22 |
| 20.95                                                          | K.M*LLYTEVTR.Y          | 1141.5922 | 2 | 1e-005 | 0.90 | 1.993 | 0.343    | 1119.9    | 1   | 14/16 |
| 20.97                                                          | R.TDDYLDQPCYETINR.I     | 1902.8174 | 2 | 8e-011 | 0.97 | 3.781 | 0.923    | 858.7     | 1   | 20/28 |
| 21.16                                                          | K.M*LLYTEVTR.Y          | 1141.5922 | 2 | 0.0008 | 0.90 | 2.231 | 0.326    | 948.3     | 1   | 14/16 |
| 21.29                                                          | R.VICILSHPIK.N          | 1179.6918 | 3 | 0.0002 | 0.43 | 1.651 | 0.670    | 146.5     | 1   | 12/36 |
| 21.32                                                          | R.VICILSHPIK.N          | 1179.6918 | 2 | 5e-005 | 0.91 | 2.562 | 0.817    | 611.4     | 1   | 11/18 |
| 21.44                                                          | K.YIAIVSTTVETK.E        | 1324.7359 | 2 | 2e-009 | 0.98 | 3.291 | 0.812    | 1775.1    | 1   | 20/22 |
| 21.65                                                          | K.YIAIVSTTVETK.E        | 1324.7359 | 2 | 1e-007 | 0.96 | 2.607 | 0.795    | 1278.9    | 1   | 17/22 |
| 22.79                                                          | K.DLGTESQIFISR.T        | 1365.7009 | 2 | 5e-008 | 0.98 | 4.144 | 0.797    | 1898.4    | 1   | 19/22 |
| 23.14                                                          | K.FLVVYVANFDEK DPR.T    | 1712.8642 | 3 | 2e-005 | 0.71 | 2.451 | 0.604    | 377.6     | 1   | 17/52 |
| 24.44                                                          | K.FLVVYVANFDEK.D        | 1344.6834 | 2 | 2e-005 | 0.96 | 3.089 | 0.805    | 1131.8    | 1   | 15/20 |
| 24.53                                                          | R.PALELLEPIEQK.F        | 1379.7781 | 2 | 1e-009 | 0.98 | 4.125 | 0.744    | 1818.4    | 1   | 19/22 |
| 24.54                                                          | K.EIRPALELLEPIEQK.F     | 1778.0058 | 3 | 1e-006 | 0.93 | 3.863 | 0.695    | 690.7     | 1   | 22/56 |
| 24.56                                                          | R.NPYYGGESASITPLEDLYK.R | 2117.0073 | 2 | 5e-021 | 0.98 | 5.042 | 0.904    | 1279.1    | 1   | 24/36 |
| 24.74                                                          | K.EIRPALELLEPIEQK.F     | 1778.0058 | 3 | 3e-005 | 0.93 | 3.467 | 0.786    | 691.7     | 1   | 23/56 |
| 24.79                                                          | R.NPYYGGESASITPLEDLYK.R | 2117.0073 | 2 | 1e-012 | 0.89 | 2.332 | 0.948    | 542.6     | 1   | 15/36 |
| 24.81                                                          | R.PALELLEPIEQK.F        | 1379.7781 | 2 | 2e-007 | 0.96 | 3.484 | 0.768    | 1102.6    | 1   | 16/22 |
| 26.64                                                          | K.FVSISDLLVPK.D         | 1217.7140 | 2 | 6e-009 | 0.97 | 3.230 | 0.927    | 1051.9    | 1   | 17/20 |
| 26.73                                                          | K.FVSISDLLVPK.D         | 1217.7140 | 2 | 3e-010 | 0.97 | 3.366 | 0.855    | 1131.6    | 1   | 17/20 |
| 27.53                                                          | K.SPYLYPLYGLGELPQGFAR.L | 2141.1066 | 2 | 4e-010 | 0.96 | 4.065 | 0.921    | 814.8     | 1   | 19/36 |
| 27.64                                                          | K.SPYLYPLYGLGELPQGFAR.L | 2141.1066 | 2 | 9e-010 | 0.95 | 3.549 | 0.906    | 703.3     | 1   | 18/36 |
| 28.27                                                          | K.VPSTAEALASSLM*GLFEK.R | 1995.9943 | 2 | 4e-016 | 0.98 | 6.176 | 0.900    | 1538.9    | 1   | 23/36 |
| 28.29                                                          | K.VPSTAEALASSLM*GLFEK.R | 1995.9943 | 3 | 0.0004 | 0.96 | 4.595 | 0.885    | 885.7     | 1   | 23/72 |
| 28.36                                                          | K.VPSTAEALASSLM*GLFEK.R | 1995.9943 | 2 | 3e-012 | 0.98 | 6.278 | 0.874    | 1206.3    | 1   | 20/36 |
| 28.37                                                          | K.VPSTAEALASSLM*GLFEK.R | 1995.9943 | 3 | 4e-008 | 0.97 | 5.590 | 0.806    | 1247.4    | 1   | 26/72 |
| 28.88                                                          | K.FDLGQDVIDFTGHALALYR.T | 2151.0869 | 3 | 0.001  | 0.43 | 1.763 | 0.809    | 107.6     | 1   | 9/72  |
