# Supplementary material
Source: PubMed Central journal article supplement (PMC3119855)
Supplement: NIHMS293380-supplement-11.pdf [file NIHMS293380-supplement-11.pdf]

SRF File: C:\Xcalibur\data\100730RS\100730RS-P12.srf

Database... 100211 uniprot\_sprot\_human.fasta

Filter(s)... peptide probability&lt;=5e-003 ; # distinct peptides&gt;=2 ; protein probability&lt;=1e-011

Mods: (M\* +15.99492) C=160.03064

| Reference  | Sequence                                            | MH+       | z | P      | Sf   | Score | Coverage | Accession      |
|------------|-----------------------------------------------------|-----------|---|--------|------|-------|----------|----------------|
| Time (s)   |                                                     |           |   | P      | Sf   | XC    | DeltaCn  | Sp RSp Ions    |
| GFAP_HUMAN | Glial fibrillary acidic protein OS=Homo sapiens GN= |           |   | 1e-011 | 12.2 | 128.2 | 0.0      | 0              |
| 18.87      | R.EAASYQEALAR.L                                     | 1208.5906 | 2 | 4e-007 | 0.97 | 3.434 | 0.725    | 1221.9 1 16/20 |
| 19.07      | R.EAASYQEALAR.L                                     | 1208.5906 | 2 | 5e-006 | 0.81 | 2.447 | 0.779    | 400.9 1 9/20   |
| 19.71      | R.LEAENNLAAAYR.Q                                    | 1263.6328 | 2 | 5e-008 | 0.96 | 3.069 | 0.664    | 1336.1 1 17/20 |
| 19.87      | R.LEAENNLAAAYR.Q                                    | 1263.6328 | 2 | 4e-005 | 0.88 | 2.386 | 0.513    | 837.8 1 13/20  |
| 19.97      | K.FADLTDAAR.N                                       | 1050.5214 | 2 | 2e-007 | 0.97 | 3.234 | 0.736    | 1385.2 1 17/18 |
| 19.99      | R.SYVSSGEM*M*VGGLAPGR.R                             | 1729.7884 | 2 | 1e-011 | 0.93 | 2.125 | 0.753    | 956.6 1 21/32  |
| 20.11      | R.KIESLEEIR.F                                       | 1245.6685 | 2 | 4e-006 | 0.94 | 3.002 | 0.392    | 1123.6 1 15/18 |
| 20.15      | K.FADLTDAAR.N                                       | 1050.5214 | 2 | 1e-007 | 0.97 | 2.830 | 0.812    | 1290.5 1 16/18 |
| 20.18      | R.SYVSSGEM*M*VGGLAPGR.R                             | 1729.7884 | 2 | 1e-010 | 0.79 | 1.320 | -        | 412.9 1 14/32  |
| 20.33      | R.KIESLEEIR.F                                       | 1245.6685 | 2 | 3e-005 | 0.85 | 2.234 | 0.608    | 591.5 1 11/18  |
| 20.60      | R.LRLDQLTANSAR.L                                    | 1357.7546 | 3 | 0.0001 | 0.87 | 2.732 | 0.695    | 749.5 1 18/44  |
| 21.73      | K.ALAAELNQLR.A                                      | 1098.6266 | 2 | 7e-006 | 0.97 | 3.429 | 0.489    | 1867.5 1 16/18 |
| 21.89      | K.ALAAELNQLR.A                                      | 1098.6266 | 2 | 1e-005 | 0.97 | 3.302 | 0.467    | 1857.8 1 16/18 |
| 21.90      | R.HLQEYQDLLNVK.L                                    | 1499.7853 | 2 | 7e-008 | 0.98 | 3.672 | 0.872    | 1871.5 1 19/22 |
| 21.94      | R.HLQEYQDLLNVK.L                                    | 1499.7853 | 3 | 0.0003 | 0.94 | 3.526 | 0.854    | 778.4 1 18/44  |
| 22.11      | R.HLQEYQDLLNVK.L                                    | 1499.7853 | 2 | 4e-006 | 0.92 | 2.756 | 0.862    | 556.9 1 12/22  |
| 22.41      | R.LEVERDNLAQDLATVR.Q                                | 1841.9716 | 3 | 0.0002 | 0.85 | 2.449 | 0.767    | 710.7 1 19/60  |
| 22.69      | R.DNLAQDLATVR.Q                                     | 1215.6328 | 2 | 1e-007 | 0.98 | 3.773 | 0.732    | 1921.7 1 18/20 |
| 22.85      | R.DNLAQDLATVR.Q                                     | 1215.6328 | 2 | 3e-007 | 0.96 | 3.045 | 0.683    | 986.0 1 18/20  |
| 24.54      | K.LALDIEIATYR.K                                     | 1277.7100 | 2 | 1e-006 | 0.96 | 3.160 | 0.891    | 1159.6 1 14/20 |
| 24.79      | K.LALDIEIATYR.K                                     | 1277.7100 | 2 | 4e-009 | 0.98 | 3.328 | 0.883    | 1851.2 1 17/20 |
| 25.08      | R.ITIPVQTFNSNLQIR.E                                 | 1629.9323 | 2 | 1e-011 | 0.92 | 2.670 | 0.618    | 718.9 1 18/26  |
| 25.31      | R.ITIPVQTFNSNLQIR.E                                 | 1629.9323 | 2 | 7e-010 | 0.64 | 1.721 | 0.574    | 286.5 1 13/26  |
| 26.22      | R.VDFSLAGALNAGFK.E                                  | 1409.7423 | 2 | 1e-009 | 0.94 | 2.137 | 0.621    | 1445.0 1 20/26 |
| 26.41      | R.VDFSLAGALNAGFK.E                                  | 1409.7423 | 2 | 8e-007 | 0.80 | 1.948 | 0.716    | 553.5 1 13/26  |
| 27.78      | K.LALDIEIATYR.K                                     | 1277.7100 | 2 | 5e-005 | 0.87 | 1.855 | 0.819    | 733.5 1 11/20  |
| 28.26      | K.LALDIEIATYR.K                                     | 1277.7100 | 2 | 1e-005 | 0.73 | 1.787 | 0.815    | 377.0 1 9/20   |

27 of 37 peptide matches reported, 10 removed due to filtering
