# Supplementary material
Source: PubMed Central journal article supplement (PMC3119855)
Supplement: NIHMS293380-supplement-12.pdf [file NIHMS293380-supplement-12.pdf]

SRF File: C:\Xcalibur\data\100730RS\100730RS-P03.srf

Database... 100211 uniprot\_sprot\_human.fasta

Filter(s)... peptide probability&lt;=5e-003 ; # distinct peptides&gt;=2 ; protein probability&lt;=1e-003

Mods: (M\* +15.99492) C=160.03064

| Reference  | Sequence                                            | MH+       | z | P      | Sf   | Score | Coverage | Accession      |
|------------|-----------------------------------------------------|-----------|---|--------|------|-------|----------|----------------|
| Time (s)   |                                                     |           |   | P      | Sf   | XC    | DeltaCn  | Sp RSp Ions    |
| GNAO_HUMAN | Guanine nucleotide-binding protein G(o) subunit alp |           |   | 6e-015 | 11.0 | 120.3 | 0.0      | 0              |
| 18.57      | K.IIHEDGFSGEDVK.Q                                   | 1445.6907 | 3 | 0.002  | 0.88 | 2.796 | 0.693    | 748.8 1 20/48  |
| 18.68      | K.IIHEDGFSGEDVK.Q                                   | 1445.6907 | 2 | 6e-010 | 0.94 | 2.801 | 0.730    | 822.5 1 18/24  |
| 18.75      | K.IIHEDGFSGEDVK.Q                                   | 1445.6907 | 2 | 3e-011 | 0.95 | 2.916 | 0.696    | 964.8 1 19/24  |
| 19.42      | R.AM*DTLGIIEYGDKER.K                                | 1613.7476 | 3 | 3e-006 | 0.85 | 3.049 | 0.825    | 258.2 1 18/52  |
| 20.32      | R.LFDVGGQR.S                                        | 891.4683  | 2 | 0.0006 | 0.93 | 1.966 | 0.722    | 771.9 1 13/14  |
| 20.35      | R.AM*DTLGIIEYGDK.E                                  | 1328.6039 | 2 | 3e-008 | 0.98 | 4.064 | 0.862    | 1298.2 1 18/22 |
| 20.47      | R.LFDVGGQR.S                                        | 891.4683  | 2 | 0.0003 | 0.94 | 2.003 | 0.727    | 752.2 1 13/14  |
| 20.48      | R.AM*DTLGIIEYGDK.E                                  | 1328.6039 | 2 | 5e-008 | 0.97 | 3.723 | 0.857    | 1271.9 1 18/22 |
| 21.27      | K.YYLDLDR.I                                         | 1044.4997 | 2 | 0.0004 | 0.88 | 2.506 | 0.199    | 690.1 1 13/14  |
| 21.61      | K.TTGIVETHFTFK.D                                    | 1380.7158 | 2 | 6e-008 | 0.95 | 2.738 | 0.767    | 1002.5 1 17/22 |
| 21.64      | R.IGAADYQTEQDILR.T                                  | 1689.8442 | 2 | 9e-010 | 0.96 | 3.872 | 0.798    | 780.2 1 20/28  |
| 21.72      | R.IGAADYQTEQDILR.T                                  | 1689.8442 | 2 | 1e-009 | 0.96 | 3.958 | 0.757    | 689.8 1 19/28  |
| 21.84      | K.TTGIVETHFTFK.D                                    | 1380.7158 | 2 | 7e-008 | 0.94 | 2.713 | 0.752    | 842.4 1 16/22  |
| 22.67      | K.LLLLGAGESGK.S                                     | 1057.6252 | 2 | 1e-006 | 0.96 | 3.031 | 0.000    | 1101.7 1 16/20 |
| 22.79      | K.LLLLGAGESGK.S                                     | 1057.6252 | 2 | 7e-007 | 0.97 | 3.390 | 0.000    | 1361.1 1 18/20 |
| 23.42      | R.M*EDTEPFSAELLSAM*M*R.L                            | 2005.8551 | 2 | 6e-012 | 0.98 | 6.008 | 0.957    | 1422.1 1 22/32 |
| 23.56      | R.M*EDTEPFSAELLSAM*M*R.L                            | 2005.8551 | 2 | 1e-012 | 0.98 | 4.799 | 0.927    | 1221.6 1 21/32 |
| 23.63      | R.M*EDTEPFSAELLSAM*M*R.L                            | 2005.8551 | 3 | 4e-006 | 0.89 | 2.551 | 0.941    | 611.9 1 21/64  |
| 25.62      | K.QYKPVVYSNTIQSLAAIVR.A                             | 2150.1968 | 3 | 4e-006 | 0.64 | 2.200 | 0.748    | 288.8 1 14/72  |
| 26.49      | K.PVVYSNTIQSLAAIVR.A                                | 1730.9799 | 2 | 8e-010 | 0.95 | 2.861 | 0.855    | 1126.2 1 16/30 |
| 28.14      | K.SPLTICFPEYTGPNTRYEDAAAYIQAFESK.N                  | 3411.5726 | 3 | 6e-015 | 0.95 | 4.249 | 0.892    | 777.9 1 25/116 |
| 28.24      | K.SPLTICFPEYTGPNTRYEDAAAYIQAFESK.N                  | 3411.5726 | 3 | 5e-011 | 0.93 | 3.953 | 0.840    | 608.1 1 24/116 |

22 of 28 peptide matches reported, 6 removed due to filtering

|             |                                                    |           |   |        |      |       |       |                |
|-------------|----------------------------------------------------|-----------|---|--------|------|-------|-------|----------------|
| IDH3A_HUMAN | Isocitrate dehydrogenase [NAD] subunit alpha, mito |           |   | 2e-008 | 4.7  | 50.3  | 0.0   | 0              |
| 21.28       | R.M*SDGLFLQK.C                                     | 1054.5238 | 2 | 2e-005 | 0.92 | 2.188 | 0.783 | 564.3 1 13/16  |
| 21.31       | R.IEAACFATIK.D                                     | 1123.5816 | 2 | 1e-006 | 0.84 | 2.301 | 0.570 | 461.0 1 12/18  |
| 21.51       | R.M*SDGLFLQK.C                                     | 1054.5238 | 2 | 0.0005 | 0.77 | 1.302 | 0.697 | 376.5 1 11/16  |
| 22.55       | K.TPYTDVNIIVTIR.E                                  | 1391.7529 | 2 | 2e-008 | 0.95 | 3.026 | 0.760 | 1046.1 1 15/22 |
| 23.44       | R.IAEFAFEYAR.N                                     | 1216.5997 | 2 | 4e-008 | 0.97 | 3.426 | 0.694 | 1602.8 1 17/18 |
| 29.24       | K.DM*ANPTALLLSAVM*M*LR.H                           | 1894.9435 | 2 | 4e-008 | 0.97 | 4.570 | 0.846 | 1143.9 1 20/32 |

6 of 6 peptide matches reported, 0 removed due to filtering
