# Supplementary material
Source: PubMed Central journal article supplement (PMC3119855)
Supplement: NIHMS293380-supplement-13.pdf [file NIHMS293380-supplement-13.pdf]

SRF File: C:\Xcalibur\data\100730RS\100730RS-P14.srf

Database... 100211 uniprot\_sprot\_human.fasta

Filter(s)... peptide probability&lt;=5e-003 ; # distinct peptides&gt;=2 ; protein probability&lt;=1e-003

Mods: (M\* +15.99492) C=160.03064

| Reference    | Sequence                                           | MH+       | z | P      | Sf   | Score | Coverage | Accession      |
|--------------|----------------------------------------------------|-----------|---|--------|------|-------|----------|----------------|
| Time (s)     |                                                    |           |   | P      | Sf   | XC    | DeltaCn  | Sp RSp Ions    |
| GRHPR_HUMAN  | Glyoxylate reductase/hydroxypyruvate reductase OS= |           |   | 1e-008 | 5.1  | 60.2  | 0.0      | 0              |
| 19.48        | R.ILDAAGANLK.V                                     | 985.5677  | 2 | 2e-005 | 0.94 | 2.723 | 0.537    | 835.7 1 16/18  |
| 19.60        | R.ILDAAGANLK.V                                     | 985.5677  | 2 | 0.0001 | 0.87 | 2.038 | 0.522    | 626.2 1 14/18  |
| 19.97        | R.RLPEAIEEVK.N                                     | 1183.6681 | 2 | 6e-006 | 0.88 | 2.210 | 0.840    | 381.1 1 11/18  |
| 20.04        | R.RLPEAIEEVK.N                                     | 1183.6681 | 2 | 0.001  | 0.67 | 1.778 | 0.719    | 252.1 1 9/18   |
| 20.32 - 20.3 | R.LPEAIEEVK.N                                      | 1027.5670 | 2 | 3e-006 | 0.92 | 2.709 | 0.681    | 465.5 1 13/16  |
| 22.56        | K.ETAVFINISR.G                                     | 1149.6262 | 2 | 7e-005 | 0.83 | 2.174 | 0.543    | 499.1 1 12/18  |
| 22.63        | K.ETAVFINISR.G                                     | 1149.6262 | 2 | 0.002  | 0.58 | 1.691 | 0.607    | 283.4 1 9/18   |
| 24.28        | K.IAAAGLDVTSPEPLPTNHPLLTLLK.N                      | 2468.3759 | 3 | 4e-005 | 0.56 | 2.090 | 0.759    | 135.5 1 13/92  |
| 26.12 - 26.1 | R.NTM*SLLAANNLLAGLR.G                              | 1687.9160 | 2 | 1e-008 | 0.98 | 4.388 | 0.763    | 2144.4 1 22/30 |

9 of 15 peptide matches reported, 6 removed due to filtering

|              |                                                     |           |   |        |      |       |       |                |
|--------------|-----------------------------------------------------|-----------|---|--------|------|-------|-------|----------------|
| RLA0_HUMAN   | 60S acidic ribosomal protein P0 OS=Homo sapiens GN= |           |   | 4e-007 | 3.6  | 40.1  | 0.0   | 0              |
| 22.21 - 22.2 | R.GNVGFVFTK.E                                       | 968.5200  | 2 | 4e-005 | 0.91 | 1.607 | 0.794 | 700.2 1 13/16  |
| 23.76        | K.IIQLLDDYPK.C                                      | 1217.6776 | 2 | 4e-007 | 0.96 | 2.391 | 0.819 | 1306.7 1 14/18 |
| 25.58 - 25.6 | K.AFLADPSAFVAAAPVAAATTAAPAAAAAPAK.V                 | 2752.4668 | 3 | 6e-005 | 0.82 | 2.561 | 0.971 | 209.6 1 20/120 |
| 26.48 - 26.5 | K.TSFFQALGITTK.I                                    | 1313.7100 | 2 | 5e-007 | 0.92 | 2.714 | 0.893 | 654.7 1 12/22  |

4 of 7 peptide matches reported, 3 removed due to filtering

|              |                                                    |           |   |        |      |       |       |                |
|--------------|----------------------------------------------------|-----------|---|--------|------|-------|-------|----------------|
| RLA0L_HUMAN  | 60S acidic ribosomal protein P0-like OS=Homo sapie |           |   | 4e-007 | 1.9  | 20.1  | 0.0   | 0              |
| 23.76        | K.IIQLLDDYPK.C                                     | 1217.6776 | 2 | 4e-007 | 0.96 | 2.391 | 0.819 | 1306.7 1 14/18 |
| 26.48 - 26.5 | K.TSFFQALGITTK.I                                   | 1313.7100 | 2 | 5e-007 | 0.92 | 2.714 | 0.893 | 654.7 1 12/22  |

2 of 5 peptide matches reported, 3 removed due to filtering

|            |                                                     |           |   |        |      |       |       |                |
|------------|-----------------------------------------------------|-----------|---|--------|------|-------|-------|----------------|
| GFAP_HUMAN | Glial fibrillary acidic protein OS=Homo sapiens GN= |           |   | 4e-007 | 1.4  | 18.1  | 0.0   | 0              |
| 24.92      | K.LALDIEIATYR.K                                     | 1277.7100 | 2 | 2e-006 | 0.97 | 2.952 | 0.845 | 1488.8 1 15/20 |
| 25.15      | K.LALDIEIATYR.K                                     | 1277.7100 | 2 | 4e-007 | 0.95 | 2.544 | 0.903 | 1090.7 1 13/20 |
| 26.23      | R.VDFSLAGALNAGFK.E                                  | 1409.7423 | 2 | 0.0002 | 0.43 | 1.423 | 0.633 | 304.3 1 10/26  |

3 of 4 peptide matches reported, 1 removed due to filtering

|              |                                                |           |   |        |      |       |       |                |
|--------------|------------------------------------------------|-----------|---|--------|------|-------|-------|----------------|
| ALBU_HUMAN   | Serum albumin OS=Homo sapiens GN=ALB PE=1 SV=2 |           |   | 2e-006 | 2.2  | 30.2  | 0.0   | 0              |
| 20.83        | K.YLYEIR.R                                     | 927.4934  | 2 | 0.0003 | 0.89 | 2.102 | 0.523 | 442.8 1 11/12  |
| 20.91        | K.YLYEIR.R                                     | 927.4934  | 2 | 0.004  | 0.90 | 2.056 | 0.599 | 448.9 1 11/12  |
| 20.93 - 20.9 | K.KVPQVSTPTLVEVSR.N                            | 1639.9377 | 3 | 2e-006 | 0.96 | 4.013 | 0.897 | 1131.8 1 25/56 |
| 21.70        | K.VPQVSTPTLVEVSR.N                             | 1511.8428 | 2 | 0.0002 | 0.35 | 1.892 | 0.478 | 246.3 1 9/26   |
| 21.78        | K.VPQVSTPTLVEVSR.N                             | 1511.8428 | 2 | 7e-005 | 0.37 | 2.174 | 0.346 | 263.6 1 10/26  |

5 of 6 peptide matches reported, 1 removed due to filtering
