# Supplementary material
Source: PubMed Central journal article supplement (PMC3119855)
Supplement: NIHMS293380-supplement-14.pdf [file NIHMS293380-supplement-14.pdf]

SRF File: C:\Xcalibur\data\100730RS\100730RS-P19.srf

Database... 100211 uniprot\_sprot\_human.fasta

Filter(s)... peptide probability&lt;=5e-003 ; # distinct peptides&gt;=2 ; protein probability&lt;=1e-003

Mods: (M\* +15.99492) C=160.03064

| Reference     | Sequence                                            | MH+       | z | P      | Sf   | Score | Coverage | Accession      |
|---------------|-----------------------------------------------------|-----------|---|--------|------|-------|----------|----------------|
| Time (s)      |                                                     |           |   | P      | Sf   | XC    | DeltaCn  | RSp Ions       |
| IMMT_HUMAN    | Mitochondrial inner membrane protein OS=Homo sapien |           |   | 1e-011 | 7.9  | 100.2 | 0.0      | 0              |
| 18.66 - 18.7K | K.SEFEQNLSEK.L                                      | 1210.5586 | 2 | 8e-006 | 0.95 | 2.699 | 0.763    | 889.7 1 14/18  |
| 18.74 - 18.7R | R.GVYSEETLR.A                                       | 1053.5211 | 2 | 4e-005 | 0.86 | 1.614 | 0.518    | 687.2 1 13/16  |
| 19.47         | R.GIEQAVQSHAVAEVEEAR.K                              | 1823.8882 | 3 | 1e-011 | 0.95 | 3.273 | 0.853    | 1138.5 1 26/64 |
| 19.50         | K.TDHPEIGEGKPTPALSEEASSSSIR.E                       | 2595.2533 | 4 | 0.001  | 0.31 | 1.975 | 0.412    | 123.8 1 12/144 |
| 19.77         | K.VVSQYHELIVVQAR.D                                  | 1527.8278 | 3 | 0.0002 | 0.31 | 1.320 | 0.860    | 63.3 1 9/48    |
| 20.61         | R.KAVDEAADALLK.A                                    | 1243.6892 | 2 | 3e-007 | 0.94 | 2.842 | 0.706    | 1050.9 1 14/22 |
| 20.68         | R.KAVDEAADALLK.A                                    | 1243.6892 | 2 | 4e-007 | 0.84 | 2.202 | 0.746    | 654.6 1 11/22  |
| 20.96         | K.LSEQELQFR.R                                       | 1149.5899 | 2 | 1e-006 | 0.94 | 3.047 | 0.318    | 1314.7 1 14/16 |
| 21.12         | K.LSEQELQFR.R                                       | 1149.5899 | 2 | 6e-006 | 0.90 | 2.322 | 0.294    | 1136.2 1 13/16 |
| 21.36         | K.AVDEAADALLK.A                                     | 1115.5943 | 2 | 6e-005 | 0.94 | 3.535 | 0.489    | 783.4 1 15/20  |
| 21.44         | K.AVDEAADALLK.A                                     | 1115.5943 | 2 | 0.0002 | 0.93 | 3.574 | 0.466    | 780.1 1 15/20  |
| 23.92         | K.TSSAETPTIPLGSAVEAIK.A                             | 1871.9960 | 2 | 1e-007 | 0.77 | 1.884 | 0.752    | 389.7 1 16/36  |
| 25.62         | K.LFEM*VLGPAAYNVPLPK.K                              | 1875.0085 | 2 | 5e-009 | 0.95 | 3.066 | 0.955    | 761.9 1 17/32  |
| 25.71         | K.LFEM*VLGPAAYNVPLPK.K                              | 1875.0085 | 2 | 6e-006 | 0.87 | 2.258 | 0.910    | 476.8 1 14/32  |

14 of 21 peptide matches reported, 7 removed due to filtering

|             |                                                    |           |   |        |      |       |       |               |
|-------------|----------------------------------------------------|-----------|---|--------|------|-------|-------|---------------|
| TBA1B_HUMAN | Tubulin alpha-1B chain OS=Homo sapiens GN=TUBA1B P |           |   | 4e-007 | 1.6  | 20.1  | 0.0   | 0             |
| 20.83       | K.DVNAAIATIK.T                                     | 1015.5782 | 2 | 0.0005 | 0.74 | 1.862 | 0.649 | 462.5 1 10/18 |
| 28.34       | R.LISQIVSSITASLR.F                                 | 1487.8792 | 2 | 1e-006 | 0.94 | 2.201 | 0.929 | 919.7 1 16/26 |
| 28.42       | R.LISQIVSSITASLR.F                                 | 1487.8792 | 2 | 4e-007 | 0.88 | 1.893 | 0.945 | 633.3 1 13/26 |

3 of 5 peptide matches reported, 2 removed due to filtering

|             |                                                    |           |   |        |      |       |       |               |
|-------------|----------------------------------------------------|-----------|---|--------|------|-------|-------|---------------|
| TBA1C_HUMAN | Tubulin alpha-1C chain OS=Homo sapiens GN=TUBA1C P |           |   | 4e-007 | 1.6  | 20.1  | 0.0   | 0             |
| 20.83       | K.DVNAAIATIK.T                                     | 1015.5782 | 2 | 0.0005 | 0.74 | 1.862 | 0.649 | 462.5 1 10/18 |
| 28.34       | R.LISQIVSSITASLR.F                                 | 1487.8792 | 2 | 1e-006 | 0.94 | 2.201 | 0.929 | 919.7 1 16/26 |
| 28.42       | R.LISQIVSSITASLR.F                                 | 1487.8792 | 2 | 4e-007 | 0.88 | 1.893 | 0.945 | 633.3 1 13/26 |

3 of 5 peptide matches reported, 2 removed due to filtering

|            |                                                |           |   |        |      |       |       |                |
|------------|------------------------------------------------|-----------|---|--------|------|-------|-------|----------------|
| ALBU_HUMAN | Serum albumin OS=Homo sapiens GN=ALB PE=1 SV=2 |           |   | 4e-006 | 2.5  | 30.2  | 0.0   | 0              |
| 20.85      | K.YLYEIAR.R                                    | 927.4934  | 2 | 0.0002 | 0.89 | 2.087 | 0.509 | 453.5 1 11/12  |
| 20.94      | K.KVPQVSTPTLVEVSR.N                            | 1639.9377 | 3 | 6e-006 | 0.97 | 4.378 | 0.911 | 1092.4 1 26/56 |
| 20.97      | K.YLYEIAR.R                                    | 927.4934  | 2 | 0.004  | 0.83 | 1.511 | 0.579 | 373.6 1 10/12  |
| 21.77      | K.VPQVSTPTLVEVSR.N                             | 1511.8428 | 2 | 4e-006 | 0.61 | 2.512 | 0.425 | 356.1 1 11/26  |
| 21.92      | K.VPQVSTPTLVEVSR.N                             | 1511.8428 | 2 | 0.004  | 0.03 | 1.224 | 0.279 | 118.5 1 6/26   |

5 of 8 peptide matches reported, 3 removed due to filtering
