# Supplementary material
Source: PubMed Central journal article supplement (PMC3119855)
Supplement: NIHMS293380-supplement-15.pdf [file NIHMS293380-supplement-15.pdf]

SRF File: C:\Xcalibur\data\100730RS\100730RS-P27.srf

Database... 100211 uniprot\_sprot\_human.fasta

Filter(s)... peptide probability&lt;=5e-003 ; # distinct peptides&gt;=2 ; protein probability&lt;=1e-003

Mods: (M\* +15.99492) C=160.03064

| Reference   | Sequence                                          | MH+       | z | P      | Sf   | Score | Coverage | Accession      |
|-------------|---------------------------------------------------|-----------|---|--------|------|-------|----------|----------------|
| Time (s)    |                                                   |           |   | P      | Sf   | XC    | DeltaCn  | Sp RSp Ions    |
| MP2K1_HUMAN | Dual specificity mitogen-activated protein kinase |           |   | 5e-014 | 4.5  | 60.2  | 0.0      | 0              |
| 19.04       | R.YPIPPDAK.E                                      | 997.5353  | 2 | 0.002  | 0.52 | 1.762 | 0.567    | 228.3 1 8/16   |
| 20.31       | R.IPEQILGK.V                                      | 897.5404  | 2 | 5e-005 | 0.89 | 2.179 | 0.530    | 369.5 1 13/14  |
| 20.52       | K.KLEELELDEQQR.K                                  | 1529.7806 | 2 | 8e-008 | 0.95 | 2.600 | 0.869    | 1144.1 1 15/22 |
| 20.87       | K.LEELELDEQQR.K                                   | 1401.6856 | 2 | 5e-006 | 0.79 | 1.411 | 0.651    | 505.1 1 13/20  |
| 22.22       | K.RLEAFLTQK.Q                                     | 1105.6364 | 2 | 0.003  | 0.37 | 1.547 | 0.573    | 171.1 1 7/16   |
| 27.29       | K.LPSGVFSLEFQDFVVK.C                              | 1826.9323 | 2 | 5e-014 | 0.98 | 4.402 | 0.861    | 1945.2 1 22/30 |

6 of 11 peptide matches reported, 5 removed due to filtering

|            |                                                    |           |   |        |      |       |       |                |
|------------|----------------------------------------------------|-----------|---|--------|------|-------|-------|----------------|
| KCRB_HUMAN | Creatine kinase B-type OS=Homo sapiens GN=CKB PE=1 |           |   | 1e-009 | 7.6  | 80.3  | 0.0   | 0              |
| 19.54      | K.LLIEM*EQR.L                                      | 1047.5503 | 2 | 2e-005 | 0.93 | 2.073 | 0.660 | 744.1 1 13/14  |
| 19.78      | K.LLIEM*EQR.L                                      | 1047.5503 | 2 | 0.0002 | 0.87 | 1.775 | 0.645 | 521.0 1 11/14  |
| 20.00      | R.LEQGQAIDDL*PAQK.-                                | 1672.8211 | 2 | 1e-010 | 0.97 | 3.324 | 0.726 | 1463.4 1 20/28 |
| 20.18      | R.LEQGQAIDDL*PAQK.-                                | 1672.8211 | 2 | 2e-007 | 0.94 | 2.304 | 0.663 | 1304.1 1 20/28 |
| 22.91      | R.GTGGVDTAAVGGVFDVSNADR.L                          | 1964.9308 | 2 | 1e-012 | 0.98 | 5.275 | 0.832 | 1180.0 1 24/40 |
| 23.44      | K.TDLNPDNLQGGDDLDPNYVLSR.V                         | 2518.1692 | 2 | 1e-013 | 0.96 | 3.751 | 0.965 | 630.3 1 21/44  |
| 23.84      | K.VLTPELYAELR.A                                    | 1303.7256 | 2 | 2e-005 | 0.91 | 2.693 | 0.701 | 456.9 1 14/20  |
| 23.99      | K.VLTPELYAELR.A                                    | 1303.7256 | 2 | 4e-006 | 0.81 | 1.786 | 0.638 | 450.5 1 13/20  |
| 24.66      | K.LAVEALSSLDGDLAGR.Y                               | 1586.8384 | 2 | 2e-010 | 0.98 | 4.602 | 0.809 | 2261.3 1 23/30 |
| 24.75      | K.LAVEALSSLDGDLAGR.Y                               | 1586.8384 | 2 | 2e-011 | 0.98 | 4.496 | 0.782 | 2244.3 1 23/30 |
| 25.40      | K.DLFDPIIEDR.H                                     | 1232.6157 | 2 | 7e-005 | 0.95 | 2.491 | 0.721 | 1063.1 1 15/18 |
| 25.57      | K.DLFDPIIEDR.H                                     | 1232.6157 | 2 | 0.0002 | 0.93 | 2.375 | 0.731 | 791.5 1 13/18  |

12 of 17 peptide matches reported, 5 removed due to filtering

|            |                                                     |           |   |        |      |       |       |               |
|------------|-----------------------------------------------------|-----------|---|--------|------|-------|-------|---------------|
| ACTY_HUMAN | Beta-centractin OS=Homo sapiens GN=ACTR1B PE=1 SV=1 |           |   | 1e-008 | 2.8  | 30.2  | 0.0   | 0             |
| 19.57      | K.AGFAGDQIPK.Y                                      | 1003.5207 | 2 | 0.003  | 0.91 | 1.834 | 0.689 | 895.6 1 14/18 |
| 24.01      | K.VQYTLPDGSLDVGPAR.F                                | 1788.9127 | 2 | 1e-011 | 0.96 | 3.931 | 0.808 | 707.9 1 22/32 |
| 24.20      | K.DQLQTFSEEHPVLLTEAPLNPSK.N                         | 2593.3144 | 3 | 3e-005 | 0.88 | 2.926 | 0.918 | 439.7 1 20/88 |

3 of 6 peptide matches reported, 3 removed due to filtering
