# Supplementary material
Source: PubMed Central journal article supplement (PMC3119855)
Supplement: NIHMS293380-supplement-16.pdf [file NIHMS293380-supplement-16.pdf]

SRF File: C:\Xcalibur\data\100730RS\100730RS-P01.srf

Database... 100211 uniprot\_sprot\_human.fasta

Filter(s)... peptide probability&lt;=5e-003 ; # distinct peptides&gt;=2 ; protein probability&lt;=1e-003

Mods: (M\* +15.99492) C=160.03064

| Reference    | Sequence                                           | MH+       | z | P      | Sf   | Score | Coverage | Accession |     |       |
|--------------|----------------------------------------------------|-----------|---|--------|------|-------|----------|-----------|-----|-------|
| Time (s)     |                                                    |           |   | P      | Sf   | XC    | DeltaCn  | Sp        | RSp | Ions  |
| NDUS3_HUMAN  | NADH dehydrogenase [ubiquinone] iron-sulfur protei |           |   | 2e-011 | 2.7  | 30.2  | 0.0      | 0         |     |       |
| 23.72        | K.SLVDLTAVDVPTR.Q                                  | 1385.7635 | 2 | 2e-007 | 0.85 | 2.032 | 0.982    | 168.8     | 1   | 13/24 |
| 24.05        | R.VVAEPVELAQEFR.K                                  | 1486.7900 | 2 | 2e-011 | 0.97 | 3.912 | 0.834    | 1004.4    | 1   | 19/24 |
| 27.20 - 27.2 | K.TYTDELTPIESAVSVFK.A                              | 1899.9586 | 2 | 3e-010 | 0.91 | 3.171 | 0.785    | 408.1     | 1   | 16/32 |

3 of 3 peptide matches reported, 0 removed due to filtering

|              |                                                    |           |   |        |      |       |       |        |   |       |
|--------------|----------------------------------------------------|-----------|---|--------|------|-------|-------|--------|---|-------|
| GSTM3_HUMAN  | Glutathione S-transferase Mu 3 OS=Homo sapiens GN= |           |   | 8e-007 | 4.6  | 60.2  | 0.0   | 0      |   |       |
| 20.92        | K.IAAYLQSDQFCK.M                                   | 1443.6937 | 2 | 8e-007 | 0.98 | 4.147 | 0.889 | 1711.6 | 1 | 18/22 |
| 21.17        | K.IAAYLQSDQFCK.M                                   | 1443.6937 | 2 | 6e-007 | 0.90 | 2.563 | 0.915 | 538.1  | 1 | 11/22 |
| 21.59        | K.QFSM*FLGK.F                                      | 973.4812  | 2 | 0.002  | 0.52 | 1.265 | 0.808 | 69.2   | 1 | 7/14  |
| 21.80        | K.QFSM*FLGK.F                                      | 973.4812  | 2 | 0.0006 | 0.08 | 0.817 | 0.703 | 30.3   | 1 | 4/14  |
| 22.40        | K.LKPQYLEELPGQLK.Q                                 | 1655.9367 | 3 | 3e-006 | 0.74 | 2.527 | 0.744 | 251.2  | 1 | 16/52 |
| 22.53        | R.VDIIENQVM*DFR.T                                  | 1494.7257 | 2 | 5e-003 | 0.97 | 3.683 | 0.800 | 1426.9 | 1 | 17/22 |
| 22.71        | R.VDIIENQVM*DFR.T                                  | 1494.7257 | 2 | 6e-006 | 0.96 | 3.395 | 0.796 | 1101.3 | 1 | 16/22 |
| 24.48        | R.LLLEFDTDSYEEK.R                                  | 1587.7788 | 2 | 2e-006 | 0.97 | 3.725 | 0.754 | 1557.5 | 1 | 19/24 |
| 28.63 - 28.6 | K.LDLDFPNLPYLLDGK.N                                | 1732.9156 | 2 | 3e-006 | 0.88 | 2.387 | 0.889 | 386.7  | 1 | 14/28 |

9 of 12 peptide matches reported, 3 removed due to filtering

|            |                                                     |           |   |        |      |       |       |       |   |       |
|------------|-----------------------------------------------------|-----------|---|--------|------|-------|-------|-------|---|-------|
| ACTB_HUMAN | Actin, cytoplasmic 1 OS=Homo sapiens GN=ACTB PE=1 S |           |   | 4e-005 | 3.9  | 50.2  | 0.0   | 0     |   |       |
| 19.45      | R.GYSFTTTAER.E                                      | 1132.5269 | 2 | 3e-005 | 0.84 | 2.009 | 0.704 | 499.4 | 1 | 11/18 |
| 19.67      | R.GYSFTTTAER.E                                      | 1132.5269 | 2 | 2e-005 | 0.69 | 1.771 | 0.704 | 351.8 | 1 | 9/18  |
| 22.05      | R.DLTDYLM*K.I                                       | 1014.4812 | 2 | 0.0008 | 0.85 | 1.457 | 0.734 | 336.1 | 1 | 11/14 |
| 22.21      | R.DLTDYLM*K.I                                       | 1014.4812 | 2 | 0.0006 | 0.86 | 1.575 | 0.744 | 317.2 | 1 | 11/14 |
| 22.73      | R.AVFPPIVGR.P                                       | 945.5516  | 2 | 0.0007 | 0.72 | 1.453 | 0.593 | 314.4 | 1 | 11/16 |
| 23.44      | K.DLYANTVLSGGTTM*YPGIADR.M                          | 2231.0649 | 2 | 4e-009 | 0.94 | 3.150 | 0.878 | 830.7 | 1 | 19/40 |
| 27.03      | K.LCYVALDFEQEMATAASSSSLEK.S                         | 2550.1738 | 2 | 6e-008 | 0.73 | 1.423 | -     | 353.3 | 1 | 12/44 |

7 of 10 peptide matches reported, 3 removed due to filtering

|            |                                                    |           |   |        |      |       |       |       |   |       |
|------------|----------------------------------------------------|-----------|---|--------|------|-------|-------|-------|---|-------|
| ACTG_HUMAN | Actin, cytoplasmic 2 OS=Homo sapiens GN=ACTG1 PE=1 |           |   | 4e-005 | 3.9  | 50.2  | 0.0   | 0     |   |       |
| 19.45      | R.GYSFTTTAER.E                                     | 1132.5269 | 2 | 3e-005 | 0.84 | 2.009 | 0.704 | 499.4 | 1 | 11/18 |
| 19.67      | R.GYSFTTTAER.E                                     | 1132.5269 | 2 | 2e-005 | 0.69 | 1.771 | 0.704 | 351.8 | 1 | 9/18  |
| 22.05      | R.DLTDYLM*K.I                                      | 1014.4812 | 2 | 0.0008 | 0.85 | 1.457 | 0.734 | 336.1 | 1 | 11/14 |
| 22.21      | R.DLTDYLM*K.I                                      | 1014.4812 | 2 | 0.0006 | 0.86 | 1.575 | 0.744 | 317.2 | 1 | 11/14 |
| 22.73      | R.AVFPPIVGR.P                                      | 945.5516  | 2 | 0.0007 | 0.72 | 1.453 | 0.593 | 314.4 | 1 | 11/16 |
| 23.44      | K.DLYANTVLSGGTTM*YPGIADR.M                         | 2231.0649 | 2 | 4e-009 | 0.94 | 3.150 | 0.878 | 830.7 | 1 | 19/40 |
| 27.03      | K.LCYVALDFEQEMATAASSSSLEK.S                        | 2550.1738 | 2 | 6e-008 | 0.73 | 1.423 | -     | 353.3 | 1 | 12/44 |

7 of 10 peptide matches reported, 3 removed due to filtering

|            |                                                     |           |   |        |      |       |       |        |   |       |
|------------|-----------------------------------------------------|-----------|---|--------|------|-------|-------|--------|---|-------|
| GFAP_HUMAN | Glial fibrillary acidic protein OS=Homo sapiens GN= |           |   | 6e-004 | 1.9  | 20.2  | 0.0   | 0      |   |       |
| 20.81      | K.LADVYQAEELR.E                                     | 1177.6212 | 2 | 6e-004 | 0.94 | 2.206 | 0.725 | 1013.2 | 1 | 15/18 |
| 21.75      | K.ALAAELNQLR.A                                      | 1098.6266 | 2 | 1e-004 | 0.97 | 3.327 | 0.462 | 1805.0 | 1 | 16/18 |

2 of 2 peptide matches reported, 0 removed due to filtering
