# Supplementary material
Source: PubMed Central journal article supplement (PMC3119855)
Supplement: NIHMS293380-supplement-18.pdf [file NIHMS293380-supplement-18.pdf]

SRF File: C:\Xcalibur\data\100730RS\100730RS-P05.srf

Database... 100211 uniprot\_sprot\_human.fasta

Filter(s)... peptide probability&lt;=5e-003 ; # distinct peptides&gt;=2 ; protein probability&lt;=1e-003

Mods: (M\* +15.99492) C=160.03064

| Reference   | Sequence                                           | MH+       | z | P      | Sf   | Score | Coverage | Accession |     |       |
|-------------|----------------------------------------------------|-----------|---|--------|------|-------|----------|-----------|-----|-------|
| Time (s)    |                                                    |           |   | P      | Sf   | XC    | DeltaCn  | Sp        | RSp | Ions  |
| SIRT2_HUMAN | NAD-dependent deacetylase sirtuin-2 OS=Homo sapien |           |   | 4e-012 | 4.5  | 60.2  | 0.0      | 0         |     |       |
| 19.37       | K.IFSEVTPK.C                                       | 920.5088  | 2 | 7e-005 | 0.77 | 1.383 | 0.397    | 452.6     | 1   | 12/14 |
| 20.08       | R.SPSTGLYDNLEK.Y                                   | 1323.6427 | 2 | 5e-009 | 0.96 | 2.708 | 0.795    | 1163.1    | 1   | 17/22 |
| 20.25       | R.SPSTGLYDNLEK.Y                                   | 1323.6427 | 2 | 4e-012 | 0.94 | 2.332 | 0.696    | 1140.0    | 1   | 17/22 |
| 24.12       | R.LLDELTLEGVAR.Y                                   | 1328.7420 | 2 | 3e-009 | 0.98 | 4.337 | 0.727    | 1672.4    | 1   | 18/22 |
| 24.27       | R.LLDELTLEGVAR.Y                                   | 1328.7420 | 2 | 4e-009 | 0.98 | 3.801 | 0.768    | 1984.0    | 1   | 19/22 |
| 24.41       | R.NLFSQTLSLGSQK.E                                  | 1422.7587 | 2 | 1e-007 | 0.98 | 4.491 | 0.775    | 1605.2    | 1   | 18/24 |
| 24.59       | R.NLFSQTLSLGSQK.E                                  | 1422.7587 | 2 | 2e-009 | 0.98 | 3.871 | 0.824    | 2072.1    | 1   | 20/24 |
| 24.83       | K.AGQSDPFLGM*IM*GLGGGM*DFDSK.K                     | 2379.0301 | 2 | 3e-007 | 0.05 | 1.499 | -        | 229.5     | 1   | 12/44 |
| 27.48       | K.YHLPYPEAIFFEISYFK.K                              | 2017.0106 | 3 | 0.0004 | 0.76 | 2.089 | 0.833    | 445.5     | 1   | 16/60 |

9 of 12 peptide matches reported, 3 removed due to filtering
