# Supplementary material
Source: PubMed Central journal article supplement (PMC3119855)
Supplement: NIHMS293380-supplement-19.pdf [file NIHMS293380-supplement-19.pdf]

SRF File: C:\Xcalibur\data\100730RS\100730RS-P20.srf

Database... 100211 uniprot\_sprot\_human.fasta

Filter(s)... peptide probability&lt;=5e-003 ; # distinct peptides&gt;=2 ; protein probability&lt;=1e-003

Mods: (M\* +15.99492) C=160.03064

| Reference  | Time (s)     | Sequence                                  | MH+       | z | P      | Sf   | Score | Coverage | Accession |     |        |
|------------|--------------|-------------------------------------------|-----------|---|--------|------|-------|----------|-----------|-----|--------|
|            |              |                                           |           |   | P      | Sf   | XC    | DeltaCn  | Sp        | RSp | Ions   |
| TERA_HUMAN |              | Transitional endoplasmic reticulum ATPase | OS=Homo s |   | 2e-014 | 20.7 | 250.2 | 0.0      |           | 0   |        |
|            | 17.35 - 17.4 | K.LAGESESNLR.K                            | 1075.5378 | 2 | 3e-007 | 0.95 | 2.869 | 0.636    | 978.3     | 1   | 16/18  |
|            | 19.26        | R.ESIESEIR.R                              | 962.4789  | 2 | 0.001  | 0.73 | 1.674 | 0.302    | 509.4     | 1   | 11/14  |
|            | 19.45        | R.ESIESEIR.R                              | 962.4789  | 2 | 0.0003 | 0.29 | 1.666 | 0.317    | 250.6     | 1   | 7/14   |
|            | 20.04        | R.KYEM*FAQTLQQR.G                         | 1645.8003 | 3 | 0.0004 | 0.73 | 2.396 | 0.789    | 261.9     | 1   | 14/48  |
|            | 20.25        | R.VINQILTEM*DGM*STK.K                     | 1711.8241 | 2 | 1e-012 | 0.98 | 3.611 | 0.883    | 1688.3    | 1   | 22/28  |
|            | 20.27        | R.VINQILTEM*DGM*STK.K                     | 1711.8241 | 3 | 0.001  | 0.87 | 3.043 | 0.931    | 260.0     | 1   | 18/56  |
|            | 20.38        | K.YEM*FAQTLQQR.G                          | 1517.7053 | 2 | 3e-008 | 0.95 | 2.879 | 0.914    | 937.4     | 1   | 13/22  |
|            | 21.24        | R.QTNPSAM*EVEEDDPVPEIR.R                  | 2171.9761 | 2 | 2e-013 | 0.91 | 3.003 | 0.816    | 553.5     | 1   | 16/36  |
|            | 21.25        | R.QTNPSAM*EVEEDDPVPEIR.R                  | 2171.9761 | 3 | 4e-009 | 0.93 | 2.811 | 0.885    | 875.4     | 1   | 30/72  |
|            | 21.37        | R.QTNPSAM*EVEEDDPVPEIR.R                  | 2171.9761 | 2 | 7e-009 | 0.90 | 2.878 | 0.837    | 491.9     | 1   | 15/36  |
|            | 21.42        | R.EDEEESLNEVGYDDIGCR.K                    | 2185.8826 | 2 | 1e-011 | 0.58 | 2.342 | -        | 716.5     | 1   | 19/36  |
|            | 21.44        | R.WALSQSNPSALR.E                          | 1329.6910 | 2 | 4e-007 | 0.94 | 3.253 | 0.691    | 832.2     | 1   | 14/22  |
|            | 21.45        | R.QTNPSAM*EVEEDDPVPEIR.R                  | 2171.9761 | 3 | 9e-006 | 0.23 | 0.991 | 0.745    | 91.5      | 1   | 11/72  |
|            | 21.53        | R.EVDIGILPDATGR.L                         | 1242.6325 | 2 | 0.0005 | 0.91 | 2.625 | 0.708    | 543.6     | 1   | 15/22  |
|            | 21.69        | K.GDDLSTAILK.Q                            | 1032.5572 | 2 | 3e-005 | 0.95 | 2.861 | 0.641    | 933.2     | 1   | 15/18  |
|            | 21.81        | R.FPSGNQGGAGPSQSGGGTGGSVYTEDNDDLLYG.      | 3220.3210 | 3 | 3e-005 | 0.03 | 1.163 | -        | 38.1      | 1   | 9/132  |
|            | 21.87        | K.GDDLSTAILK.Q                            | 1032.5572 | 2 | 2e-005 | 0.93 | 2.282 | 0.621    | 916.4     | 1   | 15/18  |
|            | 21.95        | R.FPSGNQGGAGPSQSGGGTGGSVYTEDNDDLLYG.      | 3220.3210 | 3 | 0.0008 | 0.02 | 0.652 | -        | 10.1      | 1   | 5/132  |
|            | 22.02        | K.AIANEQANFISIK.G                         | 1578.7944 | 2 | 8e-007 | 0.93 | 2.902 | 0.727    | 888.0     | 1   | 15/26  |
|            | 22.17        | R.LGDVISIQPCPDVK.Y                        | 1540.8040 | 2 | 4e-008 | 0.96 | 4.080 | 0.702    | 855.5     | 1   | 17/26  |
|            | 22.36        | K.GVLFGPPGCGK.T                           | 1251.6191 | 2 | 1e-005 | 0.87 | 2.430 | 0.784    | 498.1     | 1   | 12/22  |
|            | 22.41        | R.LGDVISIQPCPDVK.Y                        | 1540.8040 | 2 | 4e-006 | 0.91 | 3.037 | 0.775    | 547.0     | 1   | 14/26  |
|            | 22.48        | R.GILLYGPPGTGK.T                          | 1172.6674 | 2 | 6e-008 | 0.96 | 3.738 | 0.000    | 924.6     | 1   | 16/22  |
|            | 22.66        | R.GILLYGPPGTGK.T                          | 1172.6674 | 2 | 7e-007 | 0.96 | 3.114 | 0.000    | 1205.0    | 1   | 18/22  |
|            | 22.97        | K.GDIFLVR.G                               | 819.4723  | 2 | 0.003  | 0.76 | 2.120 | 0.149    | 630.8     | 1   | 10/12  |
|            | 23.28        | K.M*DELOQLFR.G                            | 1067.5190 | 2 | 0.0001 | 0.97 | 2.953 | 0.686    | 1523.3    | 1   | 13/14  |
|            | 23.31        | R.LIVDEAINEDNSVVLSQPK.M                   | 2170.1238 | 3 | 2e-006 | 0.96 | 4.573 | 0.896    | 811.8     | 1   | 25/76  |
|            | 23.45        | R.LIVDEAINEDNSVVLSQPK.M                   | 2170.1238 | 2 | 2e-014 | 0.98 | 4.785 | 0.949    | 2007.3    | 1   | 25/38  |
|            | 23.47        | K.M*DELOQLFR.G                            | 1067.5190 | 2 | 0.0002 | 0.97 | 2.834 | 0.687    | 1487.9    | 1   | 13/14  |
|            | 23.52        | R.LIVDEAINEDNSVVLSQPK.M                   | 2170.1238 | 3 | 7e-007 | 0.93 | 3.354 | 0.927    | 753.6     | 1   | 25/76  |
|            | 23.63        | R.LIVDEAINEDNSVVLSQPK.M                   | 2170.1238 | 2 | 1e-013 | 0.98 | 3.711 | 0.953    | 1950.6    | 1   | 26/38  |
|            | 24.54        | R.IVSQLLTLM*DGLK.Q                        | 1446.8236 | 2 | 6e-009 | 0.98 | 4.335 | 0.793    | 1417.4    | 1   | 18/24  |
|            | 24.57        | K.DVDLEFLAK.M                             | 1049.5514 | 2 | 3e-005 | 0.91 | 1.928 | 0.747    | 580.2     | 1   | 13/16  |
|            | 24.69        | R.IVSQLLTLM*DGLK.Q                        | 1446.8236 | 2 | 3e-008 | 0.97 | 4.021 | 0.836    | 1375.3    | 1   | 18/24  |
|            | 24.74        | K.DVDLEFLAK.M                             | 1049.5514 | 2 | 2e-007 | 0.90 | 1.862 | 0.726    | 546.3     | 1   | 13/16  |
|            | 25.99        | R.LDQLIYIPLPDEK.S                         | 1556.8570 | 2 | 2e-008 | 0.96 | 3.862 | 0.707    | 1069.4    | 1   | 17/24  |
|            | 26.14        | R.LDQLIYIPLPDEK.S                         | 1556.8570 | 2 | 2e-007 | 0.95 | 3.226 | 0.746    | 914.1     | 1   | 16/24  |
|            | 27.98        | R.AVANETGAFFFLINGPEIM*SK.L                | 2272.1318 | 3 | 8e-007 | 0.75 | 2.780 | 0.826    | 224.2     | 1   | 13/80  |
|            | 28.85        | K.M*DLIDLEDETIDAEMV*NSLAVTM*DDFR.W        | 3149.3847 | 3 | 2e-009 | 0.89 | 3.396 | 0.879    | 278.6     | 1   | 21/104 |
|            | 28.89 - 28.9 | R.QAAPCVLFFDELDSIAK.A                     | 1923.9521 | 2 | 1e-011 | 0.70 | 1.400 | 0.748    | 422.0     | 1   | 14/32  |
|            | 28.94        | K.M*DLIDLEDETIDAEMV*NSLAVTM*DDFR.W        | 3149.3847 | 3 | 0.0005 | 0.35 | 1.242 | 0.724    | 38.6      | 1   | 8/104  |
|            | 28.98        | R.QAAPCVLFFDELDSIAK.A                     | 1923.9521 | 3 | 2e-005 | 0.52 | 2.199 | 0.563    | 340.2     | 1   | 14/64  |
|            | 29.20 - 29.2 | K.NAPAIIFIDELDAIAPK.R                     | 1810.9949 | 2 | 2e-011 | 0.94 | 2.283 | 0.729    | 1206.1    | 1   | 22/32  |
|            | 29.38 - 29.4 | K.NAPAIIFIDELDAIAPK.R                     | 1810.9949 | 3 | 3e-009 | 0.84 | 2.642 | 0.798    | 494.9     | 1   | 20/64  |

44 of 55 peptide matches reported, 11 removed due to filtering

|             |              |                        |                 |           |        |        |       |       |       |   |       |
|-------------|--------------|------------------------|-----------------|-----------|--------|--------|-------|-------|-------|---|-------|
| TBA1A_HUMAN |              | Tubulin alpha-1A chain | OS=Homo sapiens | GN=TUBA1A | P      | 6e-007 | 3.7   | 40.2  | 0.0   | 0 |       |
|             | 20.76        | K.DVNAAIATIK.T         | 1015.5782       | 2         | 0.0006 | 0.93   | 2.883 | 0.566 | 939.3 | 1 | 14/18 |
|             | 25.25        | K.EIIDLVLDLDR.I        | 1085.6201       | 2         | 5e-006 | 0.91   | 2.013 | 0.619 | 758.5 | 1 | 13/16 |
|             | 25.65        | R.AVFVDLEPTVIDEVR.T    | 1701.9058       | 2         | 6e-007 | 0.97   | 4.075 | 0.806 | 987.1 | 1 | 21/28 |
|             | 25.89        | R.AVFVDLEPTVIDEVR.T    | 1701.9058       | 2         | 0.0003 | 0.55   | 1.924 | 0.817 | 138.1 | 1 | 8/28  |
|             | 28.11 - 28.1 | R.LIGQIVSSITASLR.F     | 1457.8686       | 2         | 1e-007 | 0.89   | 2.528 | 0.843 | 581.9 | 1 | 13/26 |

5 of 9 peptide matches reported, 4 removed due to filtering

|             |              |                        |                 |           |        |        |       |       |        |   |       |
|-------------|--------------|------------------------|-----------------|-----------|--------|--------|-------|-------|--------|---|-------|
| TBA1B_HUMAN |              | Tubulin alpha-1B chain | OS=Homo sapiens | GN=TUBA1B | P      | 6e-007 | 3.8   | 40.2  | 0.0    | 0 |       |
|             | 20.76        | K.DVNAAIATIK.T         | 1015.5782       | 2         | 0.0006 | 0.93   | 2.883 | 0.566 | 939.3  | 1 | 14/18 |
|             | 25.25        | K.EIIDLVLDLDR.I        | 1085.6201       | 2         | 5e-006 | 0.91   | 2.013 | 0.619 | 758.5  | 1 | 13/16 |
|             | 25.65        | R.AVFVDLEPTVIDEVR.T    | 1701.9058       | 2         | 6e-007 | 0.97   | 4.075 | 0.806 | 987.1  | 1 | 21/28 |
|             | 25.89        | R.AVFVDLEPTVIDEVR.T    | 1701.9058       | 2         | 0.0003 | 0.55   | 1.924 | 0.817 | 138.1  | 1 | 8/28  |
|             | 28.31 - 28.3 | R.LISQIVSSITASLR.F     | 1487.8792       | 2         | 4e-006 | 0.96   | 3.441 | 0.916 | 1001.0 | 1 | 17/26 |

5 of 9 peptide matches reported, 4 removed due to filtering

|             |              |                        |                 |           |        |        |       |       |        |   |       |
|-------------|--------------|------------------------|-----------------|-----------|--------|--------|-------|-------|--------|---|-------|
| TBA1C_HUMAN |              | Tubulin alpha-1C chain | OS=Homo sapiens | GN=TUBA1C | P      | 6e-007 | 3.8   | 40.2  | 0.0    | 0 |       |
|             | 20.76        | K.DVNAAIATIK.T         | 1015.5782       | 2         | 0.0006 | 0.93   | 2.883 | 0.566 | 939.3  | 1 | 14/18 |
|             | 25.25        | K.EIIDLVLDLDR.I        | 1085.6201       | 2         | 5e-006 | 0.91   | 2.013 | 0.619 | 758.5  | 1 | 13/16 |
|             | 25.65        | R.AVFVDLEPTVIDEVR.T    | 1701.9058       | 2         | 6e-007 | 0.97   | 4.075 | 0.806 | 987.1  | 1 | 21/28 |
|             | 25.89        | R.AVFVDLEPTVIDEVR.T    | 1701.9058       | 2         | 0.0003 | 0.55   | 1.924 | 0.817 | 138.1  | 1 | 8/28  |
|             | 28.31 - 28.3 | R.LISQIVSSITASLR.F     | 1487.8792       | 2         | 4e-006 | 0.96   | 3.441 | 0.916 | 1001.0 | 1 | 17/26 |

5 of 9 peptide matches reported, 4 removed due to filtering
